# Supplementary material for: The healing of B- or N-vacancy defective BNNTs by using CO molecule: a DFT study
Source: Royal Society of Chemistry journal article supplement (doi:10.1039/c6nj00921b), 2016-01-01
Supplement: c6nj00921b1.pdf [file c6nj00921b1.pdf]

# “Supporting Information”

## **The healing of B- or N-vacancy defective BNNTs by using CO molecule: A DFT study**

**Mehdi D. Esrafil<sup>\*</sup>, Nasibeh Saeidi, Parisa Nematollahi**

Laboratory of Theoretical Chemistry, Department of Chemistry, University of Maragheh, Maragheh, Iran

\* Corresponding author. **Phone:** (+98) 4212237955. **Fax:** (+98) 4212276060. **P.O. Box:** 5513864596. **E-mail:** [esrafil@maragheh.ac.ir](mailto:esrafil@maragheh.ac.ir) (Mehdi D. Esrafil).

**Figure S1.** Optimized structures, corresponding binding distances and adsorption energies of CO molecule adsorbed over  $V^B$  and  $V^N$  by B3LYP/6-31G\*

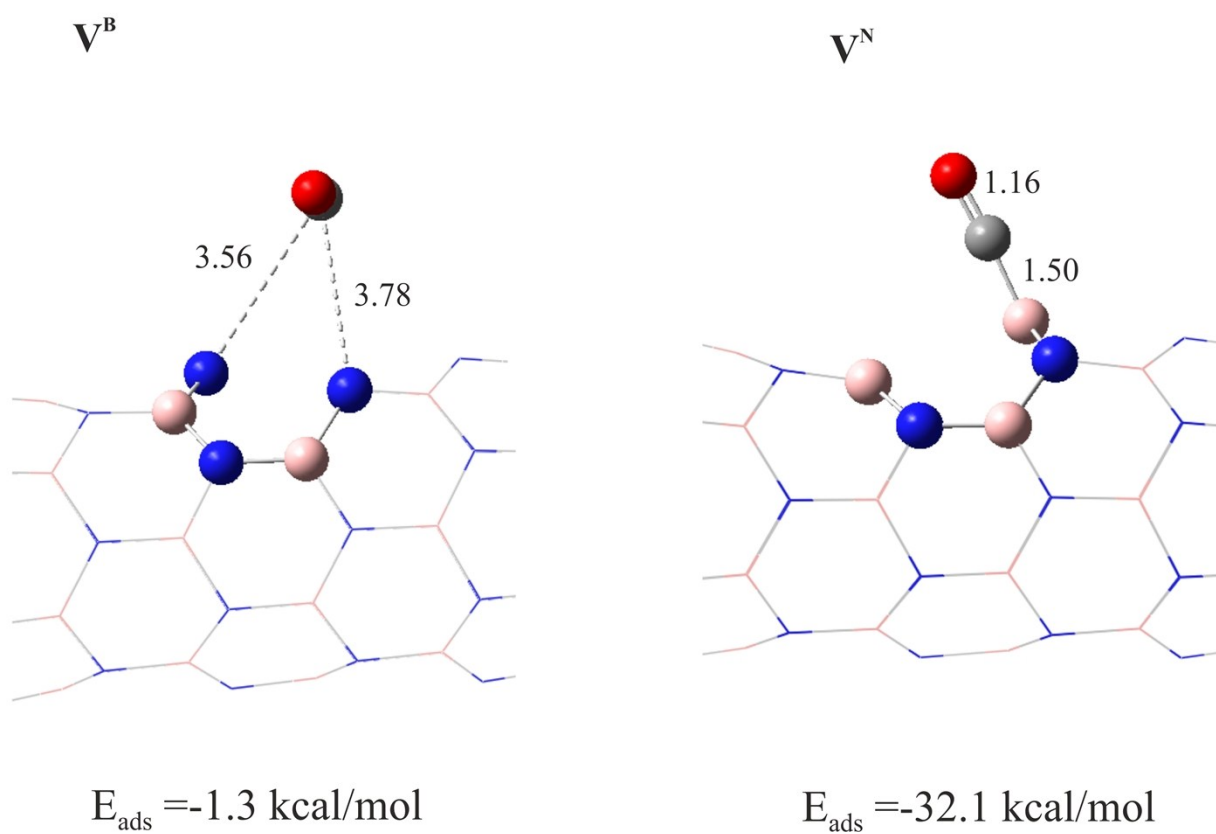

**Figure S2.** Optimized geometries of each step in the CO-vacancy recombination process over (5,0) BNNT. All energy values and distances are in kcal/mol and Å, respectively. For the transition state structures, the red arrow indicates the displacement vector along the imaginary frequency. The imaginary frequency value is shown within the bracket.

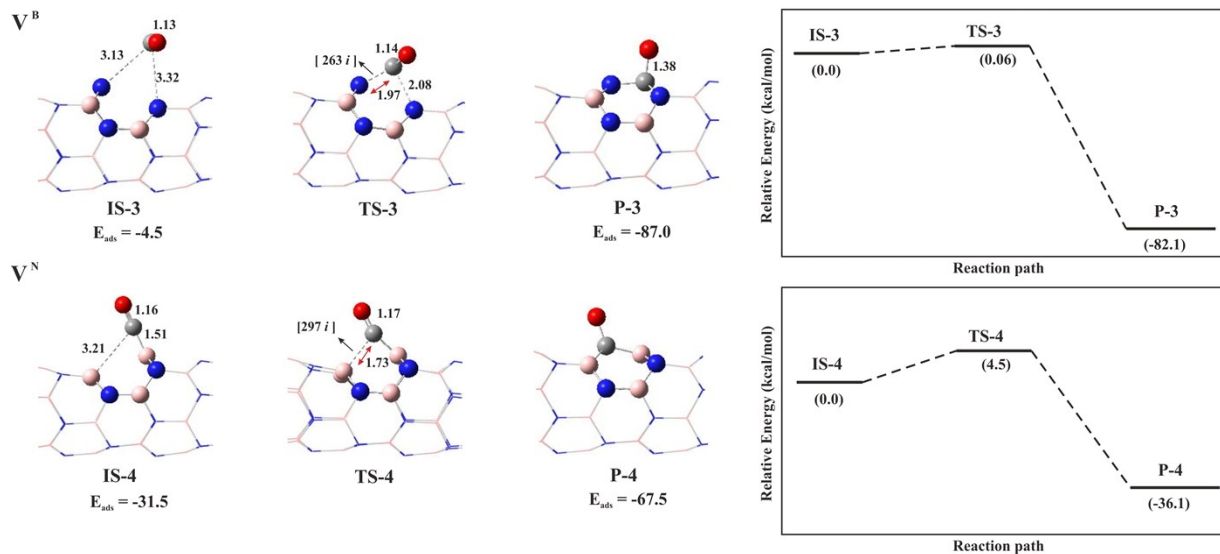

**Figure S3.** Optimized geometries of each step in the CO-vacancy recombination process over the long-length (6,0) BNNT. All energy values and distances are in kcal/mol and Å, respectively. For the transition state structures, the red arrow indicates the displacement vector along the imaginary frequency. The imaginary frequency value is shown within the bracket.

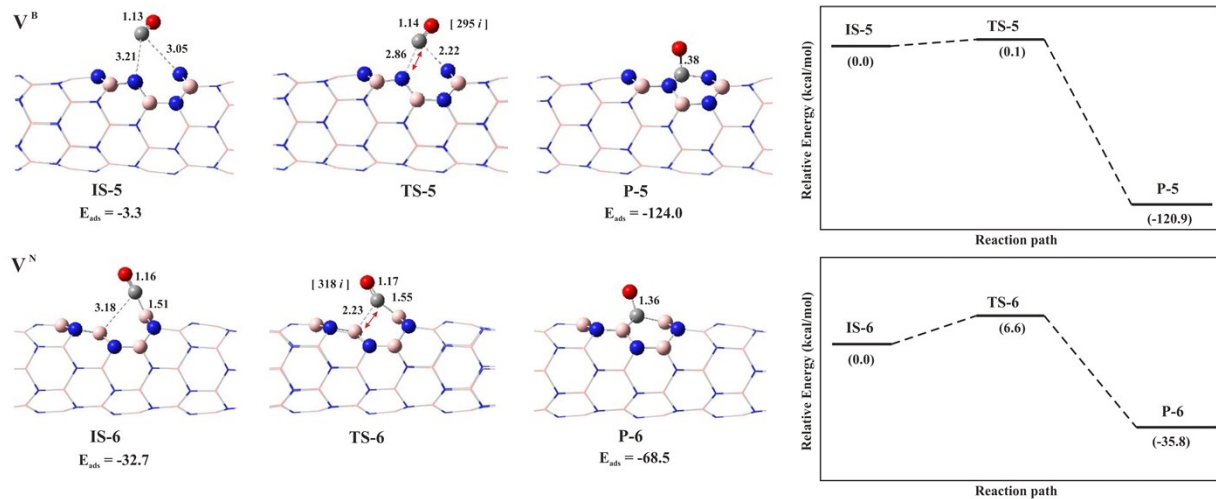

**Figure S4.** Optimized geometries along with their relative energy profile for extra O removal by CO molecule over the (5, 0) BNNT. All distances are in Å. For the transition state structures, the red arrow indicates the displacement vector along the imaginary frequency. The imaginary frequency value is shown within the bracket.

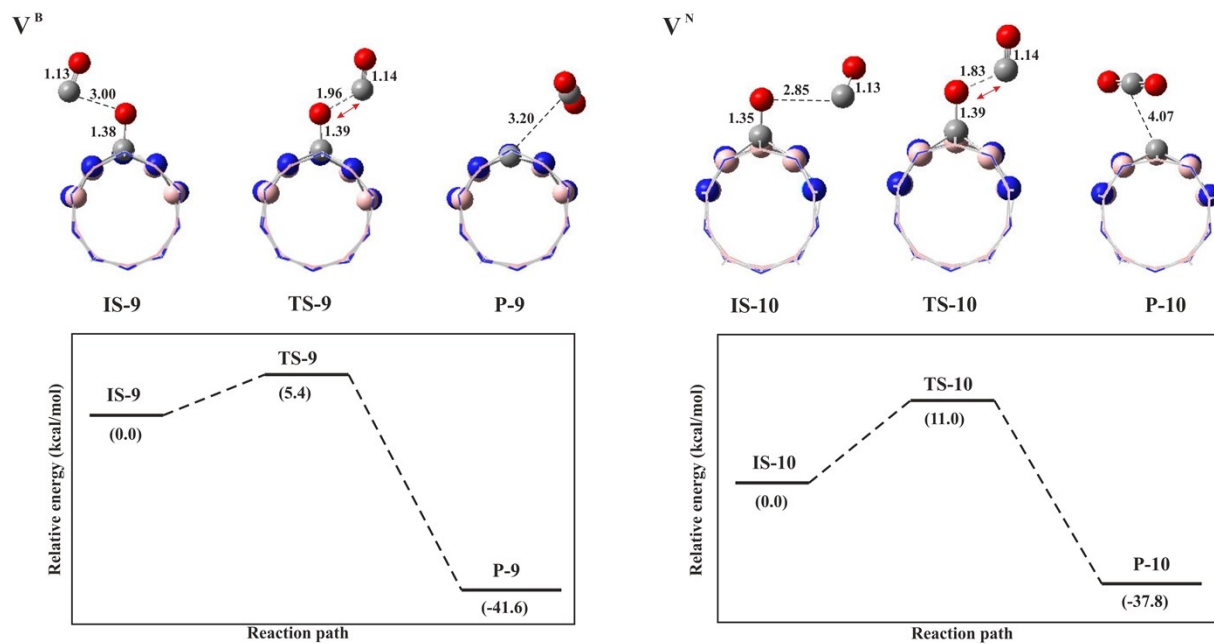

**Figure S5.** Optimized geometries along with their relative energy profile for extra O removal by CO molecule over the long-length (6, 0) BNNT. All distances are in Å. For the transition state structures, the red arrow indicates the displacement vector along the imaginary frequency. The imaginary frequency value is shown within the bracket.

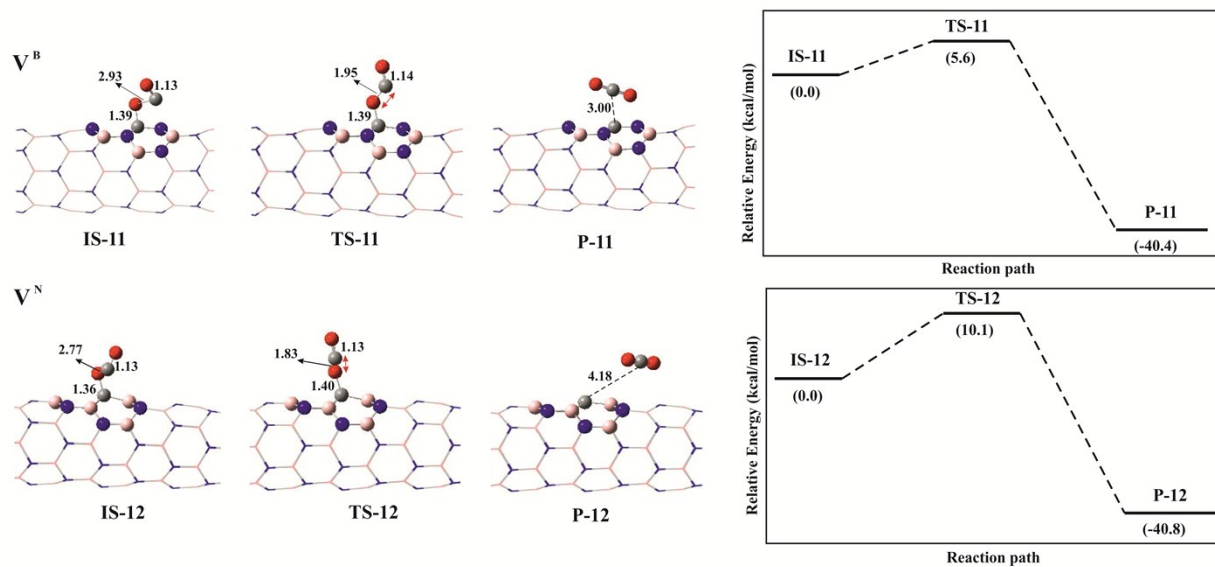

**Table S1.** Atomic coordinates of the optimized structures at the M06-2X/6-31G\* level

| <b>V<sup>B</sup></b> |             |             |             | <b>V<sup>N</sup></b> |             |             |             |
|----------------------|-------------|-------------|-------------|----------------------|-------------|-------------|-------------|
| B                    | 2.86068000  | -2.12646800 | 1.16750700  | B                    | -2.87374000 | 2.14428000  | 1.18947300  |
| N                    | 3.52616600  | -2.67805200 | -0.00268500 | N                    | -3.55927700 | 2.62177500  | 0.00020100  |
| N                    | 1.41518800  | -2.22513900 | 1.24425400  | N                    | -1.42144300 | 2.29304200  | 1.24065500  |
| B                    | 0.70307600  | -2.48603300 | -0.00208600 | B                    | -0.78573900 | 2.60344500  | 0.00021800  |
| B                    | -1.45030900 | -2.12433300 | 1.17508800  | B                    | 1.52662500  | 1.99610800  | 0.86971300  |
| N                    | -0.73955500 | -2.61099200 | -0.00205200 | N                    | 2.92150000  | 2.31726200  | 1.21131000  |
| N                    | -2.89677800 | -2.21277600 | 1.23850300  | B                    | 3.67252200  | 2.62426600  | 0.00025000  |
| B                    | -3.60822900 | -2.48540900 | -0.00149300 | B                    | -2.80603000 | 0.02571600  | 2.33176000  |
| B                    | 2.86937600  | 0.04595300  | 2.18580400  | N                    | -3.51239800 | 1.28666900  | 2.16520200  |
| N                    | 3.54232800  | -1.23518100 | 2.08719000  | N                    | -1.35918000 | 0.05011300  | 2.38800300  |
| N                    | 1.41613900  | 0.04398400  | 2.29264900  | B                    | -0.66899900 | 1.24127200  | 1.92535500  |
| B                    | 0.70687600  | -1.18386600 | 1.97224900  | B                    | 1.49768000  | 0.06717200  | 2.24523700  |
| B                    | -1.46090000 | 0.01265100  | 2.22900900  | N                    | 0.75957900  | 1.26164200  | 1.86515500  |
| N                    | -2.73596800 | -1.23583500 | 2.08181800  | N                    | 2.93517600  | 0.12475800  | 2.39109200  |
| N                    | -2.90562700 | 0.00376700  | 2.36039800  | B                    | 3.61407100  | 1.38283500  | 2.07314900  |
| B                    | -3.60992800 | -1.22480700 | 2.03250500  | B                    | -2.78041800 | -2.08443300 | 1.18807100  |
| B                    | 2.81967600  | 2.30717000  | 1.18709500  | N                    | -3.46253600 | -1.25728900 | 2.17127200  |
| N                    | 3.55672500  | 1.29511500  | 1.94305400  | N                    | -1.33472700 | -2.17620200 | 1.24778600  |
| N                    | 1.47270700  | 2.41593200  | 1.65000900  | B                    | -0.63337800 | -1.16693100 | 2.02800800  |
| B                    | 0.68451500  | 1.26350000  | 1.98910000  | B                    | 1.53878300  | -2.04037500 | 1.18907100  |
| B                    | -1.52069700 | 2.17989900  | 1.15351900  | N                    | 0.80668100  | -1.21148300 | 2.13878300  |
| N                    | -0.76207900 | 1.26305100  | 1.97381200  | N                    | 2.98884800  | -2.07797700 | 1.24137500  |
| N                    | -2.97598100 | 2.23156800  | 1.24816400  | B                    | 3.67773000  | -1.07039800 | 2.04088700  |
| B                    | -3.64790600 | 1.20810800  | 2.03313100  | B                    | -2.78040700 | -2.08423800 | -1.18845100 |
| B                    | 2.81920100  | 2.30947600  | -1.18337600 | N                    | -3.45514500 | -2.57744700 | -0.00023400 |
| N                    | 3.37816000  | 2.94562300  | 0.00236600  | N                    | -1.33471600 | -2.17600000 | -1.24816800 |
| N                    | 1.47187500  | 2.41868200  | -1.64503300 | B                    | -0.61523400 | -2.41272000 | -0.00020600 |
| B                    | -1.52120400 | 2.18208700  | -1.15041600 | B                    | 1.53879300  | -2.04018700 | -1.18940700 |
| N                    | -0.94083900 | 2.85121900  | 0.00205900  | N                    | 0.83180600  | -2.50877000 | -0.00020800 |
| N                    | -2.97652100 | 2.23387400  | -1.24438900 | N                    | 2.98885900  | -2.07778500 | -1.24171200 |
| B                    | -3.69911600 | 2.46396300  | 0.00225000  | B                    | 3.70633200  | -2.31794300 | -0.00018400 |
| B                    | 2.86870200  | 0.05012400  | -2.18621200 | B                    | -2.80600400 | 0.02610000  | -2.33178500 |
| N                    | 3.55597200  | 1.29903000  | -1.94170100 | N                    | -3.46251300 | -1.25693200 | -2.17152100 |
| N                    | 1.41549500  | 0.04815600  | -2.29302300 | N                    | -1.35915400 | 0.05050600  | -2.38800700 |
| B                    | 0.68384400  | 1.26704900  | -1.98715500 | B                    | -0.63335700 | -1.16660000 | -2.02821400 |
| B                    | -1.46167300 | 0.01664100  | -2.22911500 | B                    | 1.49770300  | 0.06753400  | -2.24522200 |
| N                    | -0.76281000 | 1.26677800  | -1.97275700 | N                    | 0.80670200  | -1.21114100 | -2.13898900 |
| N                    | -2.90642600 | 0.00783300  | -2.36018600 | N                    | 2.93520100  | 0.12514800  | -2.39105100 |
| B                    | -3.64867300 | 1.21161200  | -2.03072600 | B                    | 3.67774800  | -1.07007200 | -2.04105200 |
| B                    | 2.86035600  | -2.12411100 | -1.17155200 | B                    | -2.87372400 | 2.14447400  | -1.18914000 |
| N                    | 3.54179700  | -1.23100400 | -2.08953400 | N                    | -3.51237300 | 1.28702500  | -2.16501900 |
| N                    | 1.41481200  | -2.22248800 | -1.24806800 | N                    | -1.42142500 | 2.29323900  | -1.24027700 |
| B                    | 0.70626500  | -1.18015900 | -1.97424200 | B                    | -0.66897700 | 1.24158100  | -1.92514600 |
| B                    | -1.45068900 | -2.12198700 | -1.17802200 | B                    | 1.52663800  | 1.99621100  | -0.86934000 |
| N                    | -0.73664500 | -1.23193100 | -2.08332700 | N                    | 0.75960200  | 1.26194000  | -1.86493300 |
| N                    | -2.89722900 | -2.21013200 | -1.24112600 | N                    | 2.92151400  | 2.31742900  | -1.21086100 |
| B                    | -3.61059700 | -1.22115600 | -2.03361400 | B                    | 3.61409700  | 1.38316200  | -2.07286200 |
| H                    | 4.54944000  | -1.18498800 | 1.97716800  | H                    | -4.51912700 | 1.20251700  | 2.07070700  |
| H                    | 4.53289300  | -2.54835400 | -0.00266100 | H                    | -4.56218200 | 2.46774000  | 0.00018100  |
| H                    | 4.55081800  | 1.22626300  | 1.75275700  | H                    | -4.47203000 | -1.21849100 | 2.07986800  |
| H                    | 4.54887800  | -1.18083400 | -1.97924600 | H                    | -4.51910300 | 1.20285500  | -2.07054200 |
| H                    | 4.39204100  | 2.85088900  | 0.00218000  | H                    | -4.46180300 | -2.45124200 | -0.00022700 |
| H                    | 4.55027600  | 1.23023400  | -1.75251100 | H                    | -4.47200800 | -1.21815000 | -2.08012700 |
| H                    | -4.78389200 | -1.31516400 | 2.20990900  | H                    | 4.77124800  | 1.51847000  | 2.32645500  |
| H                    | -4.82501500 | 1.25547300  | 2.20784800  | H                    | 4.85736600  | -1.12338600 | 2.19882400  |
| H                    | -4.78176100 | -2.68648300 | -0.00148800 | H                    | 4.82377000  | 2.92597000  | 0.00027600  |
| H                    | -4.88274100 | 2.58792200  | 0.00264400  | H                    | 4.88756700  | -2.47002500 | -0.00018900 |
| H                    | -4.78463900 | -1.31127900 | -2.21062000 | H                    | 4.77127800  | 1.51883900  | -2.32612600 |

|             |             |             |             |             |             |             |             |
|-------------|-------------|-------------|-------------|-------------|-------------|-------------|-------------|
| H           | -4.82583900 | 1.25922400  | -2.20498000 | H           | 4.85738500  | -1.12303800 | -2.19899100 |
| <b>IS-1</b> |             |             |             | <b>IS-2</b> |             |             |             |
| B           | -2.52468400 | -2.59546300 | -1.30366800 | B           | -2.93028400 | 1.89878100  | 1.18716800  |
| N           | -3.10676600 | -3.31211100 | -0.17922900 | N           | -3.62627100 | 2.39611500  | 0.00014200  |
| N           | -1.07890600 | -2.51289700 | -1.38906400 | N           | -1.49427600 | 2.10862500  | 1.25349500  |
| B           | -0.32844600 | -2.77988100 | -0.16683200 | B           | -1.04976000 | 2.74715500  | 0.00014400  |
| B           | 1.75487700  | -2.07981900 | -1.31531500 | B           | 1.59356300  | 1.82510500  | 0.87271900  |
| N           | 1.11855300  | -2.73254500 | -0.17703300 | N           | 2.99575600  | 2.05286900  | 1.21339700  |
| N           | 3.20081100  | -1.99062800 | -1.38624800 | B           | 3.75412300  | 2.33674400  | 0.00028300  |
| B           | 3.95125800  | -2.26361300 | -0.16995000 | B           | -2.80596200 | -0.24081100 | 2.27668500  |
| B           | -2.79944700 | -0.36948700 | -2.16022600 | N           | -3.55572400 | 0.98796000  | 2.12317800  |
| N           | -3.31737800 | -1.72438100 | -2.15054700 | N           | -1.35620000 | -0.16876200 | 2.28849000  |
| N           | -1.35753600 | -0.19220600 | -2.27578300 | B           | -0.69394900 | 1.04400800  | 1.82683800  |
| B           | -0.50580100 | -1.34756700 | -2.04264700 | B           | 1.49127900  | -0.11720600 | 2.22406800  |
| B           | 1.50599400  | 0.11011400  | -2.22400400 | N           | 0.76247500  | 1.07901100  | 1.79631600  |
| N           | 0.93205100  | -1.22111500 | -2.15625400 | N           | 2.92594900  | -0.08462700 | 2.43851300  |
| N           | 2.94049000  | 0.27913200  | -2.35994000 | B           | 3.64708100  | 1.14410000  | 2.13371500  |
| B           | 3.78633000  | -0.87795500 | -2.11676400 | B           | -2.74299200 | -2.37582900 | 1.18473900  |
| B           | -3.00587700 | 1.81321400  | -1.01134800 | N           | -3.42972000 | -1.54671700 | 2.16069900  |
| N           | -3.62717500 | 0.76781400  | -1.82136700 | N           | -1.29665200 | -2.44348600 | 1.24705200  |
| N           | -1.68465200 | 2.10186800  | -1.46891700 | B           | -0.61893600 | -1.38552800 | 1.98250000  |
| B           | -0.76777700 | 1.08097000  | -1.89081200 | B           | 1.56521200  | -2.24319800 | 1.18272100  |
| B           | 1.32510300  | 2.18654900  | -0.99757100 | N           | 0.81830900  | -1.40143800 | 2.10782900  |
| N           | 0.66897600  | 1.25086000  | -1.88181300 | N           | 3.01465000  | -2.26208900 | 1.24183600  |
| N           | 2.76358400  | 2.41122600  | -1.08643100 | B           | 3.67592300  | -1.27810500 | 2.08963800  |
| B           | 3.54192600  | 1.53498900  | -1.94732000 | B           | -2.74295900 | -2.37595400 | -1.18474300 |
| B           | -2.98652300 | 1.64573900  | 1.34510100  | N           | -3.40948000 | -2.89051600 | 0.00001600  |
| N           | -3.61885600 | 2.31650500  | 0.21339400  | N           | -1.29661800 | -2.44362700 | -1.24701100 |
| N           | -1.65910900 | 1.86543500  | 1.81798600  | B           | -0.57655100 | -2.67373900 | 0.00004100  |
| B           | 1.34461100  | 2.02223200  | 1.30199100  | B           | 1.56521600  | -2.24334200 | -1.18266800 |
| N           | 0.68151300  | 2.70167000  | 0.20014500  | N           | 0.87191800  | -2.74297100 | 0.00005700  |
| N           | 2.78425800  | 2.23626900  | 1.39928200  | N           | 3.01465000  | -2.26224000 | -1.24179700 |
| B           | 3.46495300  | 2.63892100  | 0.17284000  | B           | 3.73976500  | -2.47453200 | 0.00003400  |
| B           | -2.76085700 | -0.67782400 | 2.17798200  | B           | -2.80590200 | -0.24097700 | -2.27657900 |
| N           | -3.59487000 | 0.49082500  | 2.00297600  | N           | -3.42964300 | -1.54692600 | -2.16081300 |
| N           | -1.31716300 | -0.51450800 | 2.29244100  | N           | -1.35614300 | -0.16888700 | -2.28842000 |
| B           | -0.73358800 | 0.80056600  | 2.07362800  | B           | -0.61889300 | -1.38567900 | -1.98247100 |
| B           | 1.54510500  | -0.20273200 | 2.23105100  | B           | 1.49134400  | -0.11734200 | -2.22380800 |
| N           | 0.70293000  | 0.97150300  | 2.05749000  | N           | 0.81834200  | -1.40159200 | -2.10779600 |
| N           | 2.98184200  | -0.05074200 | 2.36363300  | N           | 2.92599300  | -0.08475900 | -2.43834800 |
| B           | 3.57669500  | 1.25090500  | 2.11732300  | B           | 3.67590600  | -1.27834900 | -2.08973400 |
| B           | -2.50224900 | -2.76428700 | 1.02581700  | B           | -2.93030000 | 1.89854900  | -1.18678400 |
| N           | -3.27798100 | -2.02183400 | 2.00129300  | N           | -3.55572500 | 0.98771200  | -2.12275100 |
| N           | -1.05473100 | -2.69394400 | 1.09553800  | N           | -1.49426800 | 2.10825300  | -1.25304500 |
| B           | -0.46975100 | -1.62645600 | 1.89232500  | B           | -0.69389200 | 1.04379300  | -1.82649300 |
| B           | 1.77671300  | -2.24776100 | 1.03144600  | B           | 1.59361500  | 1.82501400  | -0.87231900 |
| N           | 0.97011100  | -1.51475800 | 1.99874400  | N           | 0.76254700  | 1.07881800  | -1.79584900 |
| N           | 3.22400000  | -2.16747200 | 1.08696100  | N           | 2.99589800  | 2.05250900  | -1.21280200 |
| B           | 3.82263800  | -1.16230700 | 1.95095700  | B           | 3.64717800  | 1.14389200  | -2.13330700 |
| H           | -4.32171500 | -1.80107300 | -2.03119000 | H           | -4.55808000 | 0.87371000  | 2.02005900  |
| H           | -4.12180400 | -3.30665200 | -0.16894600 | H           | -4.62719900 | 2.22801600  | 0.00015600  |
| H           | -4.60141400 | 0.56527300  | -1.62392100 | H           | -4.44114200 | -1.53092300 | 2.08529100  |
| H           | -4.28447400 | -2.08456800 | 1.89181600  | H           | -4.55807800 | 0.87343000  | -2.01965800 |
| H           | -4.61852600 | 2.12123300  | 0.20737900  | H           | -4.41759600 | -2.77558000 | -0.00000400 |
| H           | -4.56993900 | 0.311196100 | 1.78796200  | H           | -4.44106600 | -1.53111500 | -2.08540800 |
| H           | 4.96062100  | -0.82149000 | -2.30513900 | H           | 4.79137200  | 1.27596400  | 2.43862700  |
| H           | 4.70322400  | 1.73318200  | -2.12152900 | H           | 4.84860300  | -1.33697300 | 2.29122200  |
| H           | 5.14058900  | -2.31687700 | -0.18488200 | H           | 4.91553900  | 2.59661100  | 0.00031300  |
| H           | 4.62433000  | 2.90684300  | 0.18184500  | H           | 4.92642600  | -2.58085100 | 0.00004300  |
| H           | 5.00006800  | -1.12889400 | 2.12484900  | H           | 4.79137000  | 1.27596700  | -2.43851100 |
| H           | 4.74111700  | 1.42500800  | 2.29628500  | H           | 4.84863200  | -1.33708400 | -2.29106200 |
| C           | -1.64333600 | 4.71877100  | 0.52461000  | C           | -0.42661000 | 4.11980500  | -0.00081400 |



|             |             |             |             |             |             |             |             |
|-------------|-------------|-------------|-------------|-------------|-------------|-------------|-------------|
| O           | -1.59575700 | 5.05380600  | -0.55662600 | O           | 0.13642400  | 5.13057200  | -0.00310700 |
| <b>TS-1</b> |             |             |             | <b>TS-2</b> |             |             |             |
| B           | -2.72962800 | -2.33198700 | -1.18538600 | B           | 2.78110800  | 1.88032100  | -1.43160300 |
| N           | -3.38382800 | -2.85948800 | 0.00000200  | N           | 3.52280600  | 2.56470000  | -0.37557000 |
| N           | -1.27962700 | -2.38386100 | -1.25025400 | N           | 1.32120900  | 1.98088200  | -1.42761900 |
| B           | -0.55872500 | -2.59551800 | -0.00000600 | B           | 0.88470900  | 2.73065300  | -0.24484400 |
| B           | 1.58595900  | -2.16869500 | -1.18862500 | B           | -1.71798400 | 1.54868500  | -1.07804800 |
| N           | 0.89054400  | -2.64817600 | -0.00001200 | N           | -3.13054300 | 1.69459300  | -1.37655700 |
| N           | 3.03679000  | -2.19158300 | -1.24073200 | B           | -3.80637300 | 2.24430300  | -0.20275800 |
| B           | 3.75808300  | -2.42623400 | -0.00001700 | B           | 2.76062200  | -0.36154800 | -2.30854900 |
| B           | -2.80501000 | -0.21861400 | -2.31028400 | N           | 3.42194800  | 0.92672400  | -2.31026800 |
| N           | -3.44139900 | -1.51253400 | -2.15130400 | N           | 1.31206200  | -0.37849500 | -2.29062600 |
| N           | -1.36159800 | -0.17928800 | -2.42197200 | B           | 0.58151700  | 0.82768300  | -1.93938100 |
| B           | -0.60640600 | -1.36412200 | -2.04281100 | B           | -1.53673700 | -0.50901900 | -2.18856700 |
| B           | 1.50705500  | -0.08074700 | -2.33795500 | N           | -0.86741000 | 0.76919700  | -1.93914700 |
| N           | 0.84032000  | -1.35967000 | -2.14265100 | N           | -2.97913700 | -0.57155900 | -2.33762100 |
| N           | 2.95146100  | -0.01326000 | -2.43324200 | B           | -3.76803200 | 0.64115800  | -2.13311200 |
| B           | 3.71206300  | -1.19359600 | -2.05447600 | B           | 2.85189700  | -2.35839000 | -0.98860700 |
| B           | -2.84475400 | 1.91481100  | -1.15849400 | N           | 3.46839500  | -1.60424400 | -2.06941000 |
| N           | -3.50251400 | 1.03670700  | -2.10814600 | N           | 1.41158500  | -2.51697200 | -1.00187900 |
| N           | -1.40222300 | 1.98767000  | -1.18152600 | B           | 0.65390600  | -1.59951800 | -1.84021200 |
| B           | -0.68321000 | 1.02285700  | -1.97390400 | B           | -1.45472700 | -2.47735300 | -0.87979100 |
| B           | 1.40579600  | 2.02766900  | -1.18420500 | N           | -0.78095000 | -1.72477300 | -1.93317000 |
| N           | 0.74611200  | 1.13632400  | -2.10707900 | N           | -2.89973400 | -2.59390300 | -0.89489400 |
| N           | 2.84746800  | 2.16926100  | -1.23288600 | B           | -3.64374600 | -1.75867100 | -1.82918900 |
| B           | 3.60316100  | 1.22594900  | -2.04403400 | B           | 2.91366700  | -2.06202300 | 1.35882600  |
| B           | -2.84473000 | 1.91482000  | 1.15851500  | N           | 3.57333700  | -2.69334400 | 0.22772700  |
| N           | -3.51796000 | 2.47886900  | 0.00001800  | N           | 1.47305800  | -2.17418200 | 1.46682700  |
| N           | -1.40219300 | 1.98767000  | 1.18152100  | B           | 0.73406000  | -2.61405400 | 0.28799500  |
| B           | 1.40581100  | 2.02765700  | 1.18423100  | B           | -1.39926000 | -2.10722800 | 1.45300900  |
| N           | 0.67855200  | 2.49364100  | 0.00002100  | N           | -0.70744800 | -2.75874100 | 0.34287800  |
| N           | 2.84747800  | 2.16925500  | 1.23291300  | N           | -2.84571800 | -2.16775000 | 1.55037100  |
| B           | 3.55074200  | 2.47967300  | 0.00000800  | B           | -3.58239300 | -2.64221300 | 0.38990800  |
| B           | -2.80499000 | -0.21860400 | 2.31030100  | B           | 2.91699200  | 0.18605800  | 2.21527100  |
| N           | -3.50249200 | 1.03671400  | 2.10816900  | N           | 3.59033300  | -1.09926300 | 2.21038500  |
| N           | -1.36158300 | -0.17930000 | 2.42197800  | N           | 1.46557800  | 0.20130200  | 2.26500000  |
| B           | -0.68319100 | 1.02285800  | 1.97391900  | B           | 0.76660000  | -1.06460900 | 2.08738700  |
| B           | 1.50706300  | -0.08076900 | 2.33795400  | B           | -1.38597100 | 0.15202600  | 2.16843700  |
| N           | 0.74612200  | 1.13632000  | 2.10711700  | N           | -0.66897100 | -1.11211500 | 2.22314700  |
| N           | 2.95147300  | -0.01328500 | 2.43322900  | N           | -2.81936800 | 0.17901300  | 2.37180100  |
| B           | 3.60317500  | 1.22592400  | 2.04403400  | B           | -3.53702300 | -1.07052400 | 2.21723100  |
| B           | -2.72962400 | -2.33198000 | 1.18539300  | B           | 2.93080400  | 2.20109500  | 0.90866900  |
| N           | -3.44139100 | -1.51253100 | 2.15131300  | N           | 3.62061700  | 1.41861800  | 1.91072200  |
| N           | -1.27962100 | -2.38387400 | 1.25024900  | N           | 1.49979200  | 2.38542600  | 1.02785800  |
| B           | -0.60640300 | -1.36412500 | 2.04279700  | B           | 0.74402000  | 1.33883600  | 1.71155600  |
| B           | 1.58596600  | -2.16870800 | 1.18860200  | B           | -1.55856500 | 1.95371900  | 0.60544500  |
| N           | 0.84033100  | -1.35967500 | 2.14262100  | N           | -0.69441200 | 1.31122700  | 1.61897800  |
| N           | 3.03679800  | -2.19160400 | 1.24070300  | N           | -2.95825600 | 2.23951100  | 0.98651900  |
| B           | 3.71207300  | -1.19362000 | 2.05445600  | B           | -3.56123200 | 1.37595200  | 1.97946300  |
| H           | -4.44895600 | -1.48818800 | -2.03677800 | H           | 4.43354300  | 0.89642400  | -2.24741800 |
| H           | -4.39373800 | -2.76075500 | 0.00000800  | H           | 4.52967500  | 2.45202600  | -0.43399200 |
| H           | -4.50958700 | 0.97307700  | -2.00907600 | H           | 4.47803600  | -1.51979100 | -2.01986000 |
| H           | -4.44894800 | -1.48817400 | 2.03678400  | H           | 4.62143500  | 1.31953100  | 1.78012800  |
| H           | -4.52871300 | 2.39558900  | 0.00005200  | H           | 4.57522600  | -2.53904600 | 0.18313400  |
| H           | -4.50956300 | 0.97306900  | 2.00910600  | H           | 4.59817800  | -1.05538000 | 2.10502800  |
| H           | 4.89274500  | -1.22883400 | -2.20554300 | H           | -4.93154400 | 0.66600100  | -2.38712900 |
| H           | 4.77780400  | 1.36117700  | -2.18633100 | H           | -4.81562700 | -1.90827400 | -1.98073400 |
| H           | 4.94009500  | -2.56915700 | -0.00002100 | H           | -4.96908000 | 2.49652600  | -0.18470700 |
| H           | 4.71057300  | 2.74408000  | 0.00000300  | H           | -4.75741300 | -2.82925400 | 0.44730500  |
| H           | 4.89275200  | -1.22887000 | 2.20554300  | H           | -4.70689000 | 1.49429700  | 2.28795400  |
| H           | 4.77782500  | 1.36113200  | 2.18629600  | H           | -4.70935000 | -1.12794500 | 2.42284500  |
| C           | -0.77218900 | 2.60120200  | 0.00001700  | C           | -0.33461100 | 3.67654500  | -0.18265700 |

|            |             |             |             |            |             |             |             |
|------------|-------------|-------------|-------------|------------|-------------|-------------|-------------|
| O          | -0.93496000 | 3.97675300  | -0.00006900 | O          | -0.93490200 | 4.67349500  | -0.27343200 |
| <b>P-1</b> |             |             |             | <b>P-2</b> |             |             |             |
| B          | -2.72962800 | -2.33198700 | -1.18538600 | B          | 2.83416600  | 2.10123900  | -1.19118100 |
| N          | -3.38382800 | -2.85948800 | 0.00000200  | N          | 3.50506100  | 2.59419200  | -0.00017600 |
| N          | -1.27962700 | -2.38386100 | -1.25025400 | N          | 1.38499200  | 2.19199200  | -1.24003600 |
| B          | -0.55872500 | -2.59551800 | -0.00000600 | B          | 0.69806400  | 2.53071700  | -0.00025400 |
| B          | 1.58595900  | -2.16869500 | -1.18862500 | B          | -1.59584700 | 1.98266000  | -1.17722800 |
| N          | 0.89054400  | -2.64817600 | -0.00001200 | N          | -3.03592800 | 1.97889000  | -1.24202300 |
| N          | 3.03679000  | -2.19158300 | -1.24073200 | B          | -3.74806100 | 2.28840700  | -0.00025400 |
| B          | 3.75808300  | -2.42623400 | -0.00001700 | B          | 2.85940000  | 0.00380800  | -2.33872800 |
| B          | -2.80501000 | -0.21861400 | -2.31028400 | N          | 3.51272600  | 1.28842700  | -2.18230700 |
| N          | -3.44139900 | -1.51253400 | -2.15130400 | N          | 1.40702300  | -0.03360100 | -2.38358200 |
| N          | -1.36159800 | -0.17928800 | -2.42197200 | B          | 0.66704300  | 1.14197200  | -1.95045500 |
| B          | -0.60640600 | -1.36412200 | -2.04281100 | B          | -1.45735300 | -0.17617200 | -2.25495500 |
| B          | 1.50705500  | -0.08074700 | -2.33795500 | N          | -0.79373400 | 1.09198000  | -1.97221000 |
| N          | 0.84032000  | -1.35967000 | -2.14265100 | N          | -2.90130400 | -0.23393700 | -2.36976900 |
| N          | 2.95146100  | -0.01326000 | -2.43324200 | B          | -3.68843500 | 0.93191000  | -2.00187700 |
| B          | 3.71206300  | -1.19359600 | -2.05447600 | B          | 2.94478000  | -2.09856500 | -1.19128100 |
| B          | -2.84475400 | 1.91481100  | -1.15849400 | N          | 3.57539500  | -1.24945400 | -2.18651500 |
| N          | -3.50251400 | 1.03670700  | -2.10814600 | N          | 1.50516200  | -2.26181800 | -1.24798700 |
| N          | -1.40222300 | 1.98767000  | -1.18152600 | B          | 0.75056900  | -1.28151700 | -2.01503300 |
| B          | -0.68321000 | 1.02285700  | -1.97390400 | B          | -1.36142500 | -2.29763500 | -1.18044800 |
| B          | 1.40579600  | 2.02766900  | -1.18420500 | N          | -0.68833500 | -1.39850200 | -2.10754000 |
| N          | 0.74611200  | 1.13632400  | -2.10707900 | N          | -2.80301300 | -2.44634300 | -1.23979500 |
| N          | 2.84746800  | 2.16926100  | -1.23288600 | B          | -3.55542400 | -1.49096300 | -2.03724800 |
| B          | 3.60316100  | 1.22594900  | -2.04403400 | B          | 2.94476600  | -2.09833000 | 1.19162100  |
| B          | -2.84473000 | 1.91482000  | 1.15851500  | N          | 3.64337500  | -2.54911200 | 0.00022200  |
| N          | -3.51796000 | 2.47886900  | 0.00001800  | N          | 1.50514200  | -2.26155600 | 1.24831700  |
| N          | -1.40219300 | 1.98767000  | 1.18152100  | B          | 0.80717900  | -2.54431000 | 0.00019100  |
| B          | 1.40581100  | 2.02765700  | 1.18423100  | B          | -1.36143900 | -2.29744700 | 1.18078300  |
| N          | 0.67855200  | 2.49364100  | 0.00002100  | N          | -0.62830100 | -2.73672900 | 0.00021000  |
| N          | 2.84747800  | 2.16925500  | 1.23291300  | N          | -2.80303400 | -2.44613900 | 1.24013000  |
| B          | 3.55074200  | 2.47967300  | 0.00000800  | B          | -3.50273900 | -2.74691700 | 0.00018600  |
| B          | -2.80499000 | -0.21860400 | 2.31030100  | B          | 2.85934500  | 0.00422800  | 2.33874300  |
| N          | -3.50249200 | 1.03671400  | 2.10816900  | N          | 3.57534700  | -1.24905200 | 2.18673000  |
| N          | -1.36158300 | -0.17930000 | 2.42197800  | N          | 1.40696500  | -0.03317400 | 2.38353400  |
| B          | -0.68319100 | 1.02285800  | 1.97391900  | B          | 0.75052300  | -1.28117100 | 2.01521200  |
| B          | 1.50706300  | -0.08076900 | 2.33795400  | B          | -1.45740300 | -0.17581500 | 2.25495800  |
| N          | 0.74612200  | 1.13632000  | 2.10711700  | N          | -0.68837300 | -1.39817100 | 2.10775400  |
| N          | 2.95147300  | -0.01328500 | 2.43322900  | N          | -2.90135100 | -0.23356700 | 2.36976900  |
| B          | 3.60317500  | 1.22592400  | 2.04403400  | B          | -3.55545500 | -1.49064800 | 2.03743000  |
| B          | -2.72962400 | -2.33198000 | 1.18539300  | B          | 2.83410400  | 2.10147900  | 1.19089800  |
| N          | -3.44139100 | -1.51253100 | 2.15131300  | N          | 3.51265100  | 1.28884100  | 2.18219600  |
| N          | -1.27962100 | -2.38387400 | 1.25024900  | N          | 1.38492800  | 2.19226300  | 1.23967700  |
| B          | -0.60640300 | -1.36412500 | 2.04279700  | B          | 0.66699200  | 1.14231800  | 1.95023000  |
| B          | 1.58596600  | -2.16870800 | 1.18860200  | B          | -1.59594000 | 1.98277100  | 1.17680500  |
| N          | 0.84033100  | -1.35967500 | 2.14262100  | N          | -0.79378700 | 1.09229200  | 1.97197800  |
| N          | 3.03679800  | -2.19160400 | 1.24070300  | N          | -3.03600900 | 1.97903300  | 1.24159100  |
| B          | 3.71207300  | -1.19362000 | 2.05445600  | B          | -3.68849700 | 0.93220200  | 2.00165000  |
| H          | -4.44895600 | -1.48818800 | -2.03677800 | H          | 4.52227000  | 1.24678900  | -2.09210500 |
| H          | -4.39373800 | -2.76075500 | 0.00000800  | H          | 4.51374100  | 2.48600600  | -0.00014300 |
| H          | -4.50958700 | 0.97307700  | -2.00907600 | H          | 4.58241600  | -1.15857300 | -2.10412700 |
| H          | -4.44894800 | -1.48817400 | 2.03678400  | H          | 4.52219400  | 1.24718900  | 2.09197700  |
| H          | -4.52871300 | 2.39558900  | 0.00005200  | H          | 4.64272200  | -2.37436600 | 0.00020700  |
| H          | -4.50956300 | 0.97306900  | 2.00910600  | H          | 4.58237500  | -1.15819900 | 2.10439800  |
| H          | 4.89274500  | -1.22883400 | -2.20554300 | H          | -4.87316000 | 0.92071200  | -2.12877200 |
| H          | 4.77780400  | 1.36117700  | -2.18633100 | H          | -4.72482200 | -1.62937500 | -2.21258400 |
| H          | 4.94009500  | -2.56915700 | -0.00002100 | H          | -4.91646100 | 2.51039000  | -0.00033600 |
| H          | 4.71057300  | 2.74408000  | 0.00000300  | H          | -4.66681400 | -2.99635100 | 0.00019600  |
| H          | 4.89275200  | -1.22887000 | 2.20554300  | H          | -4.87321500 | 0.92103800  | 2.12860400  |
| H          | 4.77782500  | 1.36113200  | 2.18629600  | H          | -4.72486600 | -1.62902200 | 2.21271600  |
| C          | -0.77218900 | 2.60120200  | 0.00001700  | C          | -0.86333900 | 2.81491400  | -0.00025600 |

|             |             |             |             |             |             |             |             |
|-------------|-------------|-------------|-------------|-------------|-------------|-------------|-------------|
| O           | -0.93496000 | 3.97675300  | -0.00006900 | O           | -1.32126100 | 4.09198300  | 0.00018900  |
| <b>IS-3</b> |             |             |             | <b>IS-4</b> |             |             |             |
| H           | -4.80597200 | 1.32700100  | 0.00331500  | H           | -4.60340400 | 1.74266200  | -0.00141500 |
| H           | -4.38740200 | 0.13971300  | 2.27004000  | H           | -4.51357300 | 0.23605700  | 1.87194300  |
| H           | -4.39529700 | 0.10498100  | -2.25502700 | H           | -4.51352600 | 0.23308500  | -1.87241300 |
| H           | -4.27186800 | -2.14440600 | 1.21202000  | H           | -4.38440500 | -2.04101900 | 1.20909800  |
| H           | -4.27162400 | -2.16898000 | -1.18828600 | H           | -4.38434500 | -2.04294200 | -1.20654100 |
| H           | 4.80283900  | 2.34062000  | -0.01772200 | H           | 4.92211400  | 2.15020500  | -0.00144000 |
| H           | 4.82462800  | 0.82751700  | 2.10718800  | H           | 4.79899000  | 0.61198800  | 2.30505800  |
| H           | 4.82130200  | 0.79876500  | -2.11950000 | H           | 4.79941800  | 0.60786300  | -2.30515400 |
| H           | 4.98797700  | -1.62243400 | 1.34227500  | H           | 4.87540800  | -1.83475200 | 1.32042100  |
| H           | 4.98529000  | -1.64634000 | -1.33723200 | H           | 4.87498400  | -1.83878300 | -1.31957300 |
| B           | 3.63318400  | 2.12124400  | -0.01445900 | B           | 3.75956700  | 1.89564900  | -0.00126600 |
| B           | 3.66029400  | 0.72671800  | 1.87788800  | B           | 3.65865500  | 0.53246700  | 1.97081600  |
| B           | 3.81113300  | -1.54829000 | 1.18018500  | B           | 3.69785700  | -1.71243600 | 1.18715900  |
| B           | 3.65683100  | 0.69981900  | -1.88980300 | B           | 3.65889900  | 0.52896100  | -1.97138700 |
| B           | 3.80931100  | -1.56685900 | -1.17191100 | B           | 3.69767700  | -1.71504900 | -1.18558300 |
| B           | 1.57598300  | -0.68797300 | -1.75009000 | B           | 1.51776500  | -0.74411500 | -1.79627700 |
| B           | 1.72332700  | -2.15934500 | 0.00979400  | B           | 1.57354700  | -2.19348700 | 0.00143700  |
| B           | 1.57855400  | -0.66151800 | 1.75421100  | B           | 1.51776300  | -0.74126700 | 1.79702700  |
| B           | 1.48421800  | 1.65106300  | -1.09655600 | B           | 1.60355900  | 1.38964100  | -0.87228000 |
| B           | 1.48698000  | 1.67074300  | 1.08069400  | B           | 1.60348000  | 1.39124200  | 0.87031200  |
| B           | -0.65761000 | 0.35995900  | 1.49111700  | B           | -1.06272800 | 2.26362900  | -0.00182700 |
| B           | -0.66144200 | 0.33086400  | -1.48615800 | B           | -0.66886100 | 0.46864700  | 1.69523900  |
| B           | -0.45026600 | -1.93060500 | 1.15702300  | B           | -0.66883900 | 0.46604600  | -1.69607100 |
| B           | -0.45183300 | -1.95071800 | -1.14239600 | B           | -0.58045200 | -1.85359600 | 1.14722500  |
| B           | -2.65882200 | -1.04536200 | -1.87847200 | B           | -0.58043600 | -1.85545400 | -1.14486100 |
| B           | -2.57486800 | -2.44043500 | 0.01317500  | B           | -2.76231600 | -0.89459000 | -1.82740200 |
| B           | -2.65639600 | -1.01397700 | 1.88805200  | B           | -2.70383200 | -2.34240100 | 0.00154400  |
| B           | -2.98031100 | 1.09474600  | -1.09752300 | B           | -2.76238700 | -0.89173300 | 1.82834100  |
| B           | -2.97677000 | 1.12039000  | 1.10226700  | B           | -2.90671500 | 1.36505200  | -1.17040100 |
| N           | 2.92931200  | 1.79402500  | -1.26206400 | B           | -2.90674800 | 1.36692200  | 1.16814000  |
| N           | 2.93221500  | 1.81510100  | 1.24025700  | N           | 3.00703000  | 1.59140400  | -1.22099900 |
| N           | 3.01445400  | -0.57952200 | 1.93121400  | N           | 3.00680600  | 1.59397200  | 1.21900500  |
| N           | 3.17066000  | -2.14882100 | 0.00947300  | N           | 2.95458700  | -0.75247800 | 1.99418200  |
| N           | 3.01120200  | -0.60679600 | -1.93280500 | N           | 3.02167500  | -2.23973700 | 0.00145100  |
| N           | 0.76278200  | 0.52996200  | -1.66999300 | N           | 2.95455100  | -0.75582100 | -1.99370000 |
| N           | 0.99215300  | -1.90893500 | 1.25395500  | N           | 0.78421000  | 0.52693400  | -1.70865500 |
| N           | 0.99110800  | -1.93213200 | -1.23841600 | N           | 0.85704600  | -1.93027300 | 1.25529000  |
| N           | 0.91436900  | 2.43258400  | -0.01407700 | N           | 0.85704200  | -1.93238800 | -1.25285500 |
| N           | 0.76590500  | 0.55746300  | 1.67190800  | N           | 0.78415700  | 0.52962700  | 1.70790400  |
| N           | -1.57642000 | 1.22263100  | -0.74859600 | N           | -1.47595000 | 1.59949000  | -1.26063100 |
| N           | -1.57035100 | 1.26156000  | 0.75266500  | N           | -1.47597400 | 1.60145600  | 1.25804800  |
| N           | -1.21332200 | -0.96127500 | -1.89983100 | N           | -1.31264900 | -0.83138600 | -1.88906600 |
| N           | -1.21100900 | -0.93036500 | 1.89886300  | N           | -1.31270700 | -0.82848200 | 1.88991300  |
| N           | -1.12425500 | -2.56024500 | 0.01365000  | N           | -1.26135500 | -2.46353500 | 0.00167600  |
| N           | -3.25993300 | -2.21709300 | -1.26048400 | N           | -3.37253600 | -2.09929500 | -1.27490000 |
| N           | -3.25997700 | -2.18930800 | 1.28241500  | N           | -3.37259700 | -2.09721100 | 1.27756700  |
| N           | -3.38738700 | 0.19318400  | -2.16767200 | N           | -3.51251200 | 0.33808900  | -2.00515200 |
| N           | -3.37940500 | 0.22740500  | 2.18116900  | N           | -3.51254000 | 0.34121400  | 2.00445300  |
| N           | -3.81565800 | 1.53182500  | -0.00047700 | N           | -3.60333500 | 1.92147600  | -0.00157500 |
| C           | -1.55251400 | 4.25573600  | 0.59796800  | C           | -0.49291400 | 3.65767300  | -0.00174300 |
| O           | -1.81717000 | 4.24226000  | -0.50351800 | O           | -0.05576000 | 4.72719200  | -0.00032700 |
| <b>TS-3</b> |             |             |             | <b>TS-4</b> |             |             |             |
| H           | -4.47893800 | 1.99178900  | -0.00151700 | H           | -4.53797500 | 1.95685400  | 0.38596100  |
| H           | -4.46150700 | 0.40190600  | 1.85292200  | H           | -4.43213300 | 0.28864700  | 2.05950600  |

|            |             |             |             |            |             |             |             |
|------------|-------------|-------------|-------------|------------|-------------|-------------|-------------|
| H          | -4.46151800 | 0.39830700  | -1.85305100 | H          | -4.61306100 | 0.65148100  | -1.70484900 |
| H          | -4.41351200 | -1.92775900 | 1.18000400  | H          | -4.48537200 | -1.90613200 | 1.08600100  |
| H          | -4.41337000 | -1.93039800 | -1.17748200 | H          | -4.54889800 | -1.67034600 | -1.31877400 |
| H          | 4.70124500  | 2.37979500  | -0.00181800 | H          | 4.94463100  | 2.03081300  | 0.18389300  |
| H          | 4.78830100  | 0.73318700  | 2.03801800  | H          | 4.88958100  | 0.01809800  | 2.20738700  |
| H          | 4.78853700  | 0.72903100  | -2.03801500 | H          | 4.67915000  | 0.85513400  | -2.21109400 |
| H          | 4.89068400  | -1.77778100 | 1.30412700  | H          | 4.77406000  | -2.29813800 | 0.96238800  |
| H          | 4.89045900  | -1.78149800 | -1.30229800 | H          | 4.72310900  | -1.72790500 | -1.61420800 |
| B          | 3.55335700  | 2.06963400  | -0.00153100 | B          | 3.78000200  | 1.78864400  | 0.20404000  |
| B          | 3.61480500  | 0.62634300  | 1.86466100  | B          | 3.72980200  | 0.04637300  | 1.93901200  |
| B          | 3.71446400  | -1.65345500 | 1.17053000  | B          | 3.60983700  | -2.06411400 | 0.87540400  |
| B          | 3.61491600  | 0.62258200  | -1.86518900 | B          | 3.53936800  | 0.76934900  | -1.87341500 |
| B          | 3.71440600  | -1.65615600 | -1.16831400 | B          | 3.55061200  | -1.60720800 | -1.43946900 |
| B          | 1.52632600  | -0.71844500 | -1.85221700 | B          | 1.38768100  | -0.50041800 | -1.82824200 |
| B          | 1.57788600  | -2.13084500 | 0.00166700  | B          | 1.43345600  | -2.22805200 | -0.30402700 |
| B          | 1.52629700  | -0.71488200 | 1.85319100  | B          | 1.50600600  | -1.08850400 | 1.70162000  |
| B          | 1.42246400  | 1.54993200  | -1.15990700 | B          | 1.53450600  | 1.51094500  | -0.60849300 |
| B          | 1.42241900  | 1.55233800  | 1.15768400  | B          | 1.69185500  | 1.11868200  | 1.08196700  |
| B          | -0.65550900 | 0.44112800  | 1.80470600  | B          | -0.92198100 | 2.24579500  | 0.18501500  |
| B          | -0.65549100 | 0.43766700  | -1.80518600 | B          | -0.60052200 | 0.27017900  | 1.76552500  |
| B          | -0.58825100 | -1.81666800 | 1.16518200  | B          | -0.75136300 | 0.73707700  | -1.63922100 |
| B          | -0.58820500 | -1.81905800 | -1.16248600 | B          | -0.67206300 | -1.95288400 | 0.94092200  |
| B          | -2.76896300 | -0.83450900 | -1.83766800 | B          | -0.73608200 | -1.63398500 | -1.33811200 |
| B          | -2.72604100 | -2.25848000 | 0.00169800  | B          | -2.89726900 | -0.52219200 | -1.85647300 |
| B          | -2.76905000 | -0.83097700 | 1.83876000  | B          | -2.85290300 | -2.16303700 | -0.19792600 |
| B          | -2.80415400 | 1.44654700  | -1.13771200 | B          | -2.77404900 | -0.95042200 | 1.79775000  |
| B          | -2.80412900 | 1.44888900  | 1.13574300  | B          | -2.94413800 | 1.65307200  | -0.94715300 |
| N          | 2.86135400  | 1.70286800  | -1.23408600 | B          | -2.79030900 | 1.36126600  | 1.36544000  |
| N          | 2.86125300  | 1.70565400  | 1.23178400  | N          | 2.93793100  | 1.76209300  | -0.99647500 |
| N          | 2.97015900  | -0.67815400 | 1.96162500  | N          | 3.10482900  | 1.23416400  | 1.38433400  |
| N          | 3.02811300  | -2.20013400 | 0.00177900  | N          | 2.94647600  | -1.19283500 | 1.84082800  |
| N          | 2.97016900  | -0.68194600 | -1.96089500 | N          | 2.87731000  | -2.33451600 | -0.36198900 |
| N          | 0.77211700  | 0.52727100  | -1.95502100 | N          | 2.81870700  | -0.50036400 | -2.04008800 |
| N          | 0.85966400  | -1.87176500 | 1.25264500  | N          | 0.68608400  | 0.75652000  | -1.56314500 |
| N          | 0.85969900  | -1.87447600 | -1.24990800 | N          | 0.76080600  | -2.13502600 | 0.99862300  |
| N          | 0.70457700  | 2.10940200  | -0.00170600 | N          | 0.69712400  | -1.74230700 | -1.47504500 |
| N          | 0.77207200  | 0.53096400  | 1.95450300  | N          | 0.84420500  | 0.22023500  | 1.82835400  |
| N          | -1.36457600 | 1.53946000  | -1.18839700 | N          | -1.51938200 | 1.85956600  | -1.09054900 |
| N          | -1.36457600 | 1.54214900  | 1.18642000  | N          | -1.33295700 | 1.48572700  | 1.38017800  |
| N          | -1.32518500 | -0.84424500 | -1.96620300 | N          | -1.44712100 | -0.50910000 | -1.95471300 |
| N          | -1.32525400 | -0.84055000 | 1.96716400  | N          | -1.32656400 | -0.99396500 | 1.83470200  |
| N          | -1.27668200 | -2.38482800 | 0.00191900  | N          | -1.41845900 | -2.34736500 | -0.25659700 |
| N          | -3.40536500 | -2.01593800 | -1.26897100 | N          | -3.54191300 | -1.75612400 | -1.41987000 |
| N          | -3.40551600 | -2.01312500 | 1.27172700  | N          | -3.47792000 | -2.02915900 | 1.11617300  |
| N          | -3.45458100 | 0.44330700  | -1.97189200 | N          | -3.61480900 | 0.74655400  | -1.86334300 |
| N          | -3.45455800 | 0.44703100  | 1.97164000  | N          | -3.42057600 | 0.30662300  | 2.14303300  |
| N          | -3.46760300 | 2.08181200  | -0.00163700 | N          | -3.53204500 | 2.08428900  | 0.32580100  |
| C          | -0.74887900 | 2.17770500  | -0.00174400 | C          | 0.25267400  | 3.24199400  | 0.11436200  |
| O          | -0.96022600 | 3.54199500  | -0.00324000 | O          | 0.83581800  | 4.24895300  | 0.16816300  |
| <b>P-3</b> |             |             |             | <b>P-4</b> |             |             |             |
| H          | -4.47893800 | 1.99178900  | -0.00151700 | H          | -4.53822400 | 0.62626100  | 1.92061100  |
| H          | -4.46150700 | 0.40190600  | 1.85292200  | H          | -4.58224200 | -1.64466500 | 1.20501400  |
| H          | -4.46151800 | 0.39830700  | -1.85305100 | H          | -4.52996000 | 2.06512100  | -0.00089500 |
| H          | -4.41351200 | -1.92775900 | 1.18000400  | H          | -4.58237700 | -1.64496300 | -1.20301200 |
| H          | -4.41337000 | -1.93039800 | -1.17748200 | H          | -4.53816100 | 0.62502700  | -1.92137500 |
| H          | 4.70124500  | 2.37979500  | -0.00181800 | H          | 4.82699000  | 0.31624000  | 1.94322400  |

|             |             |             |             |             |             |             |             |
|-------------|-------------|-------------|-------------|-------------|-------------|-------------|-------------|
| H           | 4.78830100  | 0.73318700  | 2.03801800  | H           | 4.66741200  | -2.18866700 | 1.32893000  |
| H           | 4.78853700  | 0.72903100  | -2.03801500 | H           | 4.84129300  | 2.21680100  | -0.00057000 |
| H           | 4.89068400  | -1.77778100 | 1.30412700  | H           | 4.66645200  | -2.19255900 | -1.32980800 |
| H           | 4.89045900  | -1.78149800 | -1.30229800 | H           | 4.82717500  | 0.31341200  | -1.94142900 |
| B           | 3.55335700  | 2.06963400  | -0.00153100 | B           | 3.64212300  | 0.35266600  | 1.81552100  |
| B           | 3.61480500  | 0.62634300  | 1.86466100  | B           | 3.51395300  | -1.94450800 | 1.16816400  |
| B           | 3.71446400  | -1.65345500 | 1.17053000  | B           | 3.51356700  | -1.94664300 | -1.16785000 |
| B           | 3.61491600  | 0.62258200  | -1.86518900 | B           | 3.69475100  | 1.90504200  | -0.00029400 |
| B           | 3.71440600  | -1.65615600 | -1.16831400 | B           | 3.64217200  | 0.35022800  | -1.81492200 |
| B           | 1.52632600  | -0.71844500 | -1.85221700 | B           | 1.56051100  | 1.50535800  | -1.14996800 |
| B           | 1.57788600  | -2.13084500 | 0.00166700  | B           | 1.41791500  | -0.79201700 | -1.79598000 |
| B           | 1.52629700  | -0.71488200 | 1.85319100  | B           | 1.35484500  | -2.25022000 | 0.00076200  |
| B           | 1.42246400  | 1.54993200  | -1.15990700 | B           | 1.56045900  | 1.50698900  | 1.14946100  |
| B           | 1.42241900  | 1.55233800  | 1.15768400  | B           | 1.41802600  | -0.79016400 | 1.79622200  |
| B           | -0.65550900 | 0.44112800  | 1.80470600  | B           | -0.70027200 | 0.56144100  | 1.78161000  |
| B           | -0.65549100 | 0.43766700  | -1.80518600 | B           | -0.76750800 | -1.73756100 | 1.15899800  |
| B           | -0.58825100 | -1.81666800 | 1.16518200  | B           | -0.72997200 | 2.10001600  | -0.00081500 |
| B           | -0.58820500 | -1.81905800 | -1.16248600 | B           | -0.76761900 | -1.73864400 | -1.15766600 |
| B           | -2.76896300 | -0.83450900 | -1.83766800 | B           | -0.70027400 | 0.55992500  | -1.78195500 |
| B           | -2.72604100 | -2.25848000 | 0.00169800  | B           | -2.85810500 | 1.60563400  | -1.16508100 |
| B           | -2.76905000 | -0.83097700 | 1.83876000  | B           | -2.88074400 | -0.63589600 | -1.85699100 |
| B           | -2.80415400 | 1.44654700  | -1.13771200 | B           | -2.92501900 | -2.05589500 | 0.00096700  |
| B           | -2.80412900 | 1.44888900  | 1.13574300  | B           | -2.85817500 | 1.60645200  | 1.16368100  |
| N           | 2.86135400  | 1.70286800  | -1.23408600 | B           | -2.88067800 | -0.63457800 | 1.85760600  |
| N           | 2.86125300  | 1.70565400  | 1.23178400  | N           | 2.99774200  | 1.52092000  | 1.24046200  |
| N           | 2.97015900  | -0.67815400 | 1.96162500  | N           | 2.85967400  | -0.87401200 | 1.91794700  |
| N           | 3.02811300  | -2.20013400 | 0.00177900  | N           | 2.78920100  | -2.44764200 | 0.00078000  |
| N           | 2.97016900  | -0.68194600 | -1.96089500 | N           | 2.85947400  | -0.87621000 | -1.91812400 |
| N           | 0.77211700  | 0.52727100  | -1.95502100 | N           | 2.99782700  | 1.51864300  | -1.24039700 |
| N           | 0.85966400  | -1.87176500 | 1.25264500  | N           | 0.66439300  | -1.91821100 | -1.25034000 |
| N           | 0.85969900  | -1.87447600 | -1.24990800 | N           | 0.75787900  | 0.51297500  | -1.81843500 |
| N           | 0.70457700  | 2.10940200  | -0.00170600 | N           | 0.75787300  | 0.51471300  | 1.81826700  |
| N           | 0.77207200  | 0.53096400  | 1.95450300  | N           | 0.66455000  | -1.91681300 | 1.25156000  |
| N           | -1.36457600 | 1.53946000  | -1.18839700 | N           | -1.41085400 | 1.71827400  | 1.23915800  |
| N           | -1.36457600 | 1.54214900  | 1.18642000  | N           | -1.43087700 | -0.69185900 | 1.94155200  |
| N           | -1.32518500 | -0.84424500 | -1.96620300 | N           | -1.41077600 | 1.71735300  | -1.24058400 |
| N           | -1.32525400 | -0.84055000 | 1.96716400  | N           | -1.49111700 | -2.26756700 | 0.00093700  |
| N           | -1.27668200 | -2.38482800 | 0.00191900  | N           | -1.43095300 | -0.69344900 | -1.94094800 |
| N           | -3.40536500 | -2.01593800 | -1.26897100 | N           | -3.53013000 | 0.65425500  | -2.04038400 |
| N           | -3.40551600 | -2.01312500 | 1.27172700  | N           | -3.57799000 | -1.77690100 | -1.27472300 |
| N           | -3.45458100 | 0.44330700  | -1.97189200 | N           | -3.52144000 | 2.18419500  | -0.00091700 |
| N           | -3.45455800 | 0.44703100  | 1.97164000  | N           | -3.57781800 | -1.77638900 | 1.27668800  |
| N           | -3.46760300 | 2.08181200  | -0.00163700 | N           | -3.53019800 | 0.65567800  | 2.03959300  |
| C           | -0.74887900 | 2.17770500  | -0.00174400 | C           | 0.83621800  | 2.39311200  | -0.00082900 |
| O           | -0.96022600 | 3.54199500  | -0.00324000 | O           | 1.32741200  | 3.65069100  | -0.00221300 |
| <b>IS-5</b> |             |             |             | <b>IS-6</b> |             |             |             |
| B           | -4.98599600 | 0.11049700  | -2.36922900 | B           | 5.05151700  | 2.27749700  | 0.00008900  |
| N           | -5.69137900 | -1.15573700 | -2.28693100 | N           | 5.71617600  | 2.04537500  | 1.27201200  |
| N           | -3.53811900 | 0.08416800  | -2.44768600 | N           | 3.61356800  | 2.46351100  | 0.00010000  |
| B           | -2.85764200 | -1.16257200 | -2.12531200 | B           | 2.88656000  | 2.02193000  | 1.19504100  |
| B           | -0.67485300 | 0.01005700  | -2.28230300 | N           | 1.00006200  | 2.84002200  | 0.00003600  |
| N           | -1.41346400 | -1.24302100 | -2.20657700 | B           | 1.45033800  | 2.20734300  | 1.25565000  |
| N           | 0.77247500  | -0.01314000 | -2.33548100 | B           | -1.61345100 | 1.89412800  | 0.87967000  |
| B           | 1.45022100  | -1.27065400 | -2.06404700 | B           | -3.77385700 | 2.32293200  | 0.00001400  |
| B           | 3.63305500  | -0.09465400 | -2.22582600 | N           | -3.01002400 | 2.11046900  | 1.22477200  |
| N           | 2.89012000  | -1.34133100 | -2.15597600 | N           | -5.21278100 | 2.37696800  | 0.00002700  |
| N           | 5.07764000  | -0.12003100 | -2.34861300 | B           | -5.88828600 | 1.94715700  | 1.21740600  |

|   |             |             |             |   |             |             |             |
|---|-------------|-------------|-------------|---|-------------|-------------|-------------|
| B | 5.75736900  | -1.37892900 | -2.08521400 | B | 5.00766300  | 1.03741600  | -2.04190500 |
| B | -4.95712500 | 2.12277600  | -1.05866600 | N | 5.71614400  | 2.04529500  | -1.27184000 |
| N | -5.63561400 | 1.38225100  | -2.10885700 | N | 3.56135400  | 1.11783100  | -2.11084000 |
| N | -3.50818600 | 2.19549900  | -1.09099000 | B | 2.88659200  | 2.02163200  | -1.19470800 |
| B | -2.81306600 | 1.23644900  | -1.93475500 | B | 0.67142600  | 1.12583700  | -1.83372600 |
| B | -0.66028000 | 2.11341900  | -1.01688100 | N | 1.45032200  | 2.20673200  | -1.25514800 |
| N | -1.36990200 | 1.24824200  | -1.97534500 | N | -0.78301000 | 1.12990800  | -1.79444700 |
| N | 0.71393300  | 2.25918700  | -1.37229200 | B | -1.61346200 | 1.89403800  | -0.87963400 |
| B | 1.50388800  | 1.16451900  | -1.88521200 | B | -3.67951900 | 1.11741100  | -2.04544600 |
| B | 3.72880600  | 2.00820200  | -1.02689800 | N | -3.01003400 | 2.11038700  | -1.22473800 |
| N | 2.95011800  | 1.14813600  | -1.88978900 | N | -5.12969600 | 1.14017900  | -2.16269100 |
| N | 5.18271900  | 2.03501800  | -1.10510500 | B | -5.88830400 | 1.94718200  | -1.21735000 |
| B | 5.84272400  | 1.04568800  | -1.94132400 | B | 4.95084600  | -1.36099600 | -2.05068000 |
| B | -4.99037400 | 1.95854900  | 1.31218300  | N | 5.65049700  | -0.17520100 | -2.51144900 |
| N | -5.64177000 | 2.54142000  | 0.15211800  | N | 3.50159200  | -1.38362600 | -2.12686000 |
| N | -3.54424300 | 2.03025500  | 1.39592700  | B | 2.80975000  | -0.11185300 | -2.29215900 |
| B | -2.80423900 | 2.35114500  | 0.17864200  | B | 0.64762700  | -1.30475400 | -1.98677400 |
| B | -0.70597200 | 1.99237300  | 1.42074200  | N | 1.36010200  | -0.07357000 | -2.29892500 |
| N | -1.35420900 | 2.48580800  | 0.20942200  | N | -0.78949100 | -1.35208100 | -2.10509100 |
| N | 0.64482800  | 2.12502000  | 1.84998300  | B | -1.49266900 | -0.08108200 | -2.21942100 |
| B | 3.68318200  | 1.88273100  | 1.27179100  | B | -3.64893700 | -1.29209800 | -2.04080400 |
| N | 3.14196200  | 2.62444700  | 0.14686700  | N | -2.93055400 | -0.07876500 | -2.41099400 |
| N | 5.13866800  | 1.90557800  | 1.38534200  | N | -5.09444900 | -1.34639700 | -2.14896000 |
| B | 5.88731900  | 2.18755400  | 0.16417500  | B | -5.81628200 | -0.11500600 | -2.42432800 |
| B | -5.04128100 | -0.21683600 | 2.33333800  | B | 4.94617200  | -2.58703500 | -0.00001100 |
| N | -5.69141300 | 1.07726000  | 2.23009200  | N | 5.61819100  | -2.39193000 | -1.27325400 |
| N | -3.59569000 | -0.25106800 | 2.44142500  | N | 3.50212000  | -2.70053100 | -0.00003300 |
| B | -2.86753400 | 0.96746500  | 2.12429400  | B | 2.79196900  | -2.24584000 | -1.18856300 |
| B | -0.72302600 | -0.27728600 | 2.31646600  | B | 0.63973200  | -2.59828900 | -0.00003900 |
| N | -1.42944600 | 0.98745500  | 2.21841800  | N | 1.35126500  | -2.34744400 | -1.25019700 |
| N | 0.72715000  | -0.29211700 | 2.35601500  | N | -0.80337200 | -2.70683900 | -0.00001200 |
| B | 1.44755000  | 0.95215200  | 2.09972700  | B | -1.50793600 | -2.23022400 | -1.18820500 |
| B | 3.58387700  | -0.33314700 | 2.23335000  | B | -3.66627100 | -2.51907700 | 0.00004900  |
| N | 2.89516500  | 0.93972600  | 2.03676700  | N | -2.94999300 | -2.29932100 | -1.25006600 |
| N | 5.02537600  | -0.36989400 | 2.37884300  | N | -5.11280100 | -2.59650600 | 0.00008700  |
| B | 5.78831600  | 0.84036800  | 2.13160800  | B | -5.81565000 | -2.18879500 | -1.20692400 |
| B | -5.06605500 | -2.22291500 | 1.02648800  | B | 4.95084400  | -1.36096200 | 2.05062900  |
| N | -5.73777900 | -1.46194100 | 2.06559300  | N | 5.61816200  | -2.39196600 | 1.27326400  |
| N | -3.62202600 | -2.35420300 | 1.08921500  | N | 3.50158700  | -1.38350600 | 2.12672600  |
| B | -2.89714800 | -1.43248000 | 1.95427300  | B | 2.79197200  | -2.24575200 | 1.18846000  |
| B | -0.75387000 | -2.32713100 | 1.05117600  | B | 0.64766600  | -1.30459500 | 1.98660900  |
| N | -1.45123900 | -1.50846600 | 2.03834400  | N | 1.35127800  | -2.34732600 | 1.25008300  |
| N | 0.68675300  | -2.46244500 | 1.10993000  | N | -0.78943300 | -1.35194500 | 2.10497300  |
| B | 1.41409600  | -1.49596900 | 1.92090100  | B | -1.50789400 | -2.23016500 | 1.18818400  |
| B | 3.55864500  | -2.41029400 | 1.06098500  | B | -3.64885100 | -1.29205300 | 2.04087200  |
| N | 2.85282200  | -1.56670900 | 2.01482100  | N | -2.94993900 | -2.29929500 | 1.25013200  |
| N | 5.00258700  | -2.51883600 | 1.12953000  | N | -5.09435300 | -1.34638700 | 2.14912100  |
| B | 5.71810700  | -1.58760700 | 1.98789600  | B | -5.81558500 | -2.18884600 | 1.20716000  |
| B | -5.04398400 | -2.05808500 | -1.35080800 | B | 5.00766900  | 1.03749300  | 2.04205500  |
| N | -5.74020600 | -2.60945600 | -0.20128400 | N | 5.65049900  | -0.17520200 | 2.51143500  |
| N | -3.60016800 | -2.18842800 | -1.40546200 | N | 3.56137100  | 1.11799200  | 2.11107100  |
| B | -2.90720500 | -2.53070900 | -0.16920200 | B | 2.80978600  | -0.11173300 | 2.29211000  |
| B | -0.73409500 | -2.18603400 | -1.32352400 | B | 0.67148200  | 1.12611600  | 1.83381300  |
| N | -1.46783000 | -2.69168200 | -0.16780700 | N | 1.36013900  | -0.07341000 | 2.29869800  |
| N | 0.70658900  | -2.32283800 | -1.38280000 | N | -0.78295700 | 1.13007600  | 1.79450200  |
| B | 1.40344400  | -2.66590500 | -0.14625500 | B | -1.49260100 | -0.08096300 | 2.21938300  |
| B | 3.57839900  | -2.28604300 | -1.28769100 | B | -3.67948100 | 1.11746700  | 2.04548000  |
| N | 2.84472300  | -2.81856500 | -0.14412000 | N | -2.93047900 | -0.07869300 | 2.41098700  |
| N | 5.02324700  | -2.39340300 | -1.34462300 | N | -5.12965400 | 1.14018800  | 2.16275100  |
| B | 5.72221700  | -2.73866300 | -0.11589500 | B | -5.81620000 | -0.11500500 | 2.42447000  |
| H | -6.69839500 | -1.08199800 | -2.18895700 | H | 6.71950200  | 1.90727300  | 1.21242100  |
| H | -6.64484200 | 1.33642100  | -2.01710700 | H | 6.71947200  | 1.90721200  | -1.21225000 |

|             |             |             |             |             |             |             |             |
|-------------|-------------|-------------|-------------|-------------|-------------|-------------|-------------|
| H           | -6.65010900 | 2.43170200  | 0.12954100  | H           | 6.65834700  | -0.19970100 | -2.39998400 |
| H           | -6.69825400 | 1.04412800  | 2.11146100  | H           | 6.62633100  | -2.29405900 | -1.21496600 |
| H           | -6.74250900 | -1.37664100 | 1.95430500  | H           | 6.62630600  | -2.29412600 | 1.21498500  |
| H           | -6.74355600 | -2.45929700 | -0.19955300 | H           | 6.65834800  | -0.19969800 | 2.39996700  |
| H           | 6.92984500  | -1.48207800 | -2.26329400 | H           | -7.07012900 | 2.04946600  | 1.31969300  |
| H           | 7.02257800  | 1.07635900  | -2.09877400 | H           | -7.07014000 | 2.04955500  | -1.31964000 |
| H           | 7.07270000  | 2.28783000  | 0.19020900  | H           | -6.98801200 | -0.13396900 | -2.63426300 |
| H           | 6.96131800  | 0.86736800  | 2.33349500  | H           | -6.99306100 | -2.33780700 | -1.30381900 |
| H           | 6.88862900  | -1.70236700 | 2.17268000  | H           | -6.99297100 | -2.33797000 | 1.30417000  |
| H           | 6.89294500  | -2.95422600 | -0.11675900 | H           | -6.98792100 | -0.13398900 | 2.63446000  |
| C           | 1.03569300  | 4.83177300  | 0.17125500  | C           | 0.38100400  | 4.21509900  | -0.00045300 |
| O           | 1.67484900  | 5.49736000  | -0.48526600 | O           | -0.17929900 | 5.22691700  | -0.00103100 |
| <b>TS-5</b> |             |             |             | <b>TS-6</b> |             |             |             |
| B           | -4.99670700 | -0.02514800 | -2.37307800 | B           | 5.04505300  | 2.32458800  | -0.28316800 |
| N           | -5.69092900 | -1.28777800 | -2.19208600 | N           | 5.73983900  | 2.23152100  | 0.99027300  |
| N           | -3.54925600 | -0.04476800 | -2.47056300 | N           | 3.60380400  | 2.49430200  | -0.26650600 |
| B           | -2.85956600 | -1.26060700 | -2.05765600 | B           | 2.92739100  | 2.20597900  | 0.99747300  |
| B           | -0.69236800 | -0.09275300 | -2.35337600 | B           | 0.92794600  | 2.77412600  | -0.21200300 |
| N           | -1.41723700 | -1.33870700 | -2.14949500 | N           | 1.50139900  | 2.41475700  | 1.07607100  |
| N           | 0.74695700  | -0.11088100 | -2.45055400 | B           | -1.55146800 | 2.03654700  | 0.57777100  |
| B           | 1.44926000  | -1.32477500 | -2.05563400 | B           | -3.76469200 | 2.31414500  | -0.29869200 |
| B           | 3.61014400  | -0.12318900 | -2.34141700 | N           | -2.96221300 | 2.31504300  | 0.92192800  |
| N           | 2.89367000  | -1.37599600 | -2.14603000 | N           | -5.20631500 | 2.36033500  | -0.29020100 |
| N           | 5.05525200  | -0.11196000 | -2.42958500 | B           | -5.85240500 | 2.11235900  | 0.99175100  |
| B           | 5.76846000  | -1.32221300 | -2.05121500 | B           | 4.96680300  | 0.87770400  | -2.17732000 |
| B           | -4.97464600 | 2.05955600  | -1.19366100 | N           | 5.68013200  | 1.97006400  | -1.53985500 |
| N           | -5.65783900 | 1.25430400  | -2.19072600 | N           | 3.51513500  | 0.92594400  | -2.21093600 |
| N           | -3.52770600 | 2.14256200  | -1.24936900 | B           | 2.84116400  | 1.89137600  | -1.36071800 |
| B           | -2.82467900 | 1.14681300  | -2.04713700 | B           | 0.63395300  | 0.89213600  | -1.93792100 |
| B           | -0.66554500 | 2.01928700  | -1.17268500 | N           | 1.38512900  | 2.02362200  | -1.38735000 |
| N           | -1.37834800 | 1.17074700  | -2.12083800 | N           | -0.81210200 | 0.86360700  | -1.97042600 |
| N           | 0.77558800  | 2.04642900  | -1.18484800 | B           | -1.65763000 | 1.68184400  | -1.13628200 |
| B           | 1.46525200  | 1.06550800  | -1.98987700 | B           | -3.71176400 | 0.79361500  | -2.16034700 |
| B           | 3.58660800  | 1.98762900  | -1.18534600 | N           | -3.03996100 | 1.88791500  | -1.49170300 |
| N           | 2.89629300  | 1.12401000  | -2.11303700 | N           | -5.16145700 | 0.79287300  | -2.24003200 |
| N           | 5.03165700  | 2.07501700  | -1.23248900 | B           | -5.90191600 | 1.72697900  | -1.40130700 |
| B           | 5.75297800  | 1.10238600  | -2.04119200 | N           | 4.95750400  | -1.51097400 | -1.93885700 |
| B           | -4.97463300 | 2.05963100  | 1.19371900  | N           | 5.62218900  | -0.36595600 | -2.53488400 |
| N           | -5.64586200 | 2.54471100  | 0.00001600  | N           | 3.50959400  | -1.56998800 | -1.99519000 |
| N           | -3.52769700 | 2.14266100  | 1.24942200  | B           | 2.79376700  | -0.33476400 | -2.27498600 |
| B           | -2.81822300 | 2.38991400  | 0.00001700  | B           | 0.65547400  | -1.53663300 | -1.84735100 |
| B           | -0.66551300 | 2.01938200  | 1.17268500  | N           | 1.34759600  | -0.32718400 | -2.28466000 |
| N           | -1.37591000 | 2.51377600  | -0.00000100 | N           | -0.78082400 | -1.63277700 | -1.95889800 |
| N           | 0.77564600  | 2.04648600  | 1.18477500  | B           | -1.50763600 | -0.40121300 | -2.23378500 |
| B           | 3.58663300  | 1.98755200  | 1.18529300  | B           | -3.64769400 | -1.59519700 | -1.86511900 |
| N           | 2.87378500  | 2.47482100  | -0.00000100 | N           | -2.94901400 | -0.43163200 | -2.39694600 |
| N           | 5.03166800  | 2.07493900  | 1.23246700  | N           | -5.09419800 | -1.67565900 | -1.94541100 |
| B           | 5.74613900  | 2.36115200  | -0.00000900 | B           | -5.83781200 | -0.49017600 | -2.34274700 |
| B           | -4.99669000 | -0.02505500 | 2.37309800  | B           | 4.99447000  | -2.51021100 | 0.23175000  |
| N           | -5.65781800 | 1.25441400  | 2.19082300  | N           | 5.65086100  | -2.43970000 | -1.06326100 |
| N           | -3.54923700 | -0.04469200 | 2.47057100  | N           | 3.55171900  | -2.63903600 | 0.26379900  |
| B           | -2.82465000 | 1.14689700  | 2.04717200  | B           | 2.82248000  | -2.33701900 | -0.96094700 |
| B           | -0.69236300 | -0.09268100 | 2.35333500  | B           | 0.68499100  | -2.56894200 | 0.28042500  |
| N           | -1.37832300 | 1.17082700  | 2.12084000  | N           | 1.38374300  | -2.47181500 | -0.99930200 |
| N           | 0.74695600  | -0.11084200 | 2.45050400  | N           | -0.75682300 | -2.69488000 | 0.30959800  |
| B           | 1.46527000  | 1.06551700  | 1.98983600  | B           | -1.48167700 | -2.39180800 | -0.92436900 |
| B           | 3.61013400  | -0.12321500 | 2.34146100  | B           | -3.62446000 | -2.52666000 | 0.32037100  |

|            |             |             |             |            |             |             |             |
|------------|-------------|-------------|-------------|------------|-------------|-------------|-------------|
| N          | 2.89629600  | 1.12397300  | 2.11299500  | N          | -2.92436000 | -2.48418600 | -0.96022500 |
| N          | 5.05524300  | -0.11198500 | 2.42963500  | N          | -5.07042900 | -2.60995900 | 0.35573900  |
| B          | 5.75297600  | 1.10234600  | 2.04121300  | B          | -5.79307200 | -2.39026700 | -0.88759300 |
| B          | -5.03015300 | -2.10940900 | 1.19335600  | B          | 5.01277400  | -1.06994100 | 2.13814100  |
| N          | -5.69092000 | -1.28766700 | 2.19204200  | N          | 5.67834900  | -2.17464500 | 1.46861900  |
| N          | -3.58569600 | -2.23036800 | 1.24939000  | N          | 3.56333200  | -1.08713100 | 2.22760600  |
| B          | -2.85955900 | -1.26052800 | 2.05763700  | B          | 2.84900900  | -2.04947700 | 1.39641500  |
| B          | -0.71509800 | -2.19254000 | 1.19582900  | B          | 0.70473600  | -1.03385600 | 2.09964700  |
| N          | -1.41723600 | -1.33863600 | 2.14946500  | N          | 1.40900300  | -2.14576000 | 1.47746400  |
| N          | 0.72923800  | -2.30723800 | 1.25206600  | N          | -0.73130300 | -1.06700700 | 2.21157600  |
| B          | 1.44924300  | -1.32476100 | 2.05563400  | B          | -1.45379600 | -2.06007000 | 1.42778500  |
| B          | 3.60437400  | -2.21270400 | 1.18891000  | B          | -3.58725900 | -1.00456300 | 2.15106500  |
| N          | 2.89365400  | -1.37600700 | 2.14607000  | N          | -2.89398600 | -2.11984300 | 1.51320900  |
| N          | 5.05246800  | -2.29391100 | 1.24011500  | N          | -5.02909900 | -1.04226800 | 2.28558700  |
| B          | 5.76845400  | -1.32224800 | 2.05127900  | B          | -5.76049400 | -2.01424700 | 1.49093200  |
| B          | -5.03015700 | -2.10947200 | -1.19335900 | B          | 5.05908500  | 1.31272700  | 1.88853900  |
| N          | -5.71454400 | -2.57588900 | 0.00001200  | N          | 5.71572600  | 0.15730800  | 2.46702900  |
| N          | -3.58570000 | -2.23044100 | -1.24939800 | N          | 3.61569300  | 1.40216500  | 1.98974400  |
| B          | -2.87702000 | -2.47782100 | 0.00000300  | B          | 2.86563400  | 0.19129000  | 2.28855100  |
| B          | -0.71509300 | -2.19256900 | -1.19582400 | B          | 0.71495700  | 1.37301400  | 1.73692700  |
| N          | -1.43427900 | -2.61973200 | 0.00000500  | N          | 1.41463500  | 0.22323600  | 2.30247000  |
| N          | 0.72924900  | -2.30723200 | -1.25204300 | N          | -0.72118300 | 1.35766500  | 1.60223100  |
| B          | 1.44118800  | -2.54851200 | 0.00001300  | B          | -1.43341900 | 0.20795200  | 2.15150600  |
| B          | 3.60437800  | -2.21268400 | -1.18886400 | B          | -3.61138000 | 1.40674800  | 1.85166100  |
| N          | 2.88694300  | -2.65984300 | 0.00001600  | N          | -2.86692100 | 0.24611300  | 2.33380700  |
| N          | 5.05247500  | -2.29385900 | -1.24004400 | N          | -5.06216400 | 1.43346100  | 2.00763100  |
| B          | 5.76407700  | -2.56072200 | 0.00003400  | B          | -5.74125500 | 0.21842600  | 2.42666900  |
| H          | -6.69735500 | -1.21215300 | -2.08919800 | H          | 6.74304900  | 2.09639700  | 0.92227000  |
| H          | -6.66565500 | 1.20450100  | -2.08623200 | H          | 6.68611500  | 1.84768500  | -1.49217200 |
| H          | -6.65367300 | 2.42891800  | 0.00002600  | H          | 6.63263200  | -0.35884500 | -2.44667500 |
| H          | -6.66563300 | 1.20460200  | 2.08631300  | H          | 6.65811600  | -2.32401900 | -1.02832500 |
| H          | -6.69734800 | -1.21204900 | 2.08917800  | H          | 6.68510000  | -2.07701400 | 1.38957500  |
| H          | -6.71862100 | -2.43110000 | 0.00001100  | H          | 6.72178400  | 0.12238000  | 2.34291900  |
| H          | 6.94710000  | -1.40238600 | -2.19904600 | H          | -7.02970800 | 2.23889900  | 1.11548800  |
| H          | 6.93202000  | 1.19273800  | -2.18005800 | H          | -7.08866600 | 1.79005300  | -1.48108800 |
| H          | 6.91435600  | 2.58453900  | -0.00001100 | H          | -7.01331900 | -0.54451200 | -2.52332800 |
| H          | 6.93203700  | 1.19263800  | 2.17995700  | H          | -6.96810900 | -2.57177600 | -0.94994600 |
| H          | 6.94707100  | -1.40249100 | 2.19924700  | H          | -6.93775600 | -2.14066100 | 1.61916100  |
| H          | 6.93812500  | -2.75710600 | 0.00003200  | H          | -6.90851900 | 0.22627000  | 2.66203500  |
| C          | 1.42785000  | 2.63335500  | -0.00003000 | C          | -0.29149600 | 3.72537400  | -0.15859600 |
| O          | 1.31080700  | 4.01258500  | -0.00023400 | O          | -0.86215200 | 4.74021200  | -0.25973000 |
| <b>P-5</b> |             |             |             | <b>P-6</b> |             |             |             |
| B          | -4.99670700 | -0.02514800 | -2.37307800 | B          | 5.04554000  | 2.34637600  | 0.00015100  |
| N          | -5.69092900 | -1.28777800 | -2.19208600 | N          | 5.71417700  | 2.13905300  | 1.27261500  |
| N          | -3.54925600 | -0.04476800 | -2.47056300 | N          | 3.60239100  | 2.48823000  | 0.00014800  |
| B          | -2.85956600 | -1.26060700 | -2.05765600 | B          | 2.88301300  | 2.05807500  | 1.19236400  |
| B          | -0.69236800 | -0.09275300 | -2.35337600 | B          | 0.76389700  | 2.55187500  | 0.00012700  |
| N          | -1.41723700 | -1.33870700 | -2.14949500 | N          | 1.44070400  | 2.19365900  | 1.24168000  |
| N          | 0.74695700  | -0.11088100 | -2.45055400 | B          | -1.54237600 | 2.08741500  | 1.18911600  |
| B          | 1.44926000  | -1.32477500 | -2.05563400 | B          | -3.69416600 | 2.36296700  | 0.00036400  |
| B          | 3.61014400  | -0.12318900 | -2.34141700 | N          | -2.97800400 | 2.12499900  | 1.25670200  |
| N          | 2.89367000  | -1.37599600 | -2.14603000 | N          | -5.13948100 | 2.40470500  | 0.00027500  |
| N          | 5.05525200  | -0.11196000 | -2.42958500 | B          | -5.83875600 | 1.96051100  | 1.19835100  |
| B          | 5.76846000  | -1.32221300 | -2.05121500 | B          | 5.02245800  | 1.13758900  | -2.06459300 |
| B          | -4.97464600 | 2.05955600  | -1.19366100 | N          | 5.71419600  | 2.13926700  | -1.27233900 |
| N          | -5.65783900 | 1.25430400  | -2.19072600 | N          | 3.57471600  | 1.20184200  | -2.14374300 |



|   |             |             |             |   |             |             |             |
|---|-------------|-------------|-------------|---|-------------|-------------|-------------|
| N | -3.52770600 | 2.14256200  | -1.24936900 | B | 2.88301800  | 2.05830300  | -1.19215800 |
| B | -2.82467900 | 1.14681300  | -2.04713700 | B | 0.69124000  | 1.16894100  | -1.95942600 |
| B | -0.66554500 | 2.01928700  | -1.17268500 | N | 1.44070100  | 2.19397100  | -1.24153200 |
| N | -1.37834800 | 1.17074700  | -2.12083800 | N | -0.76906300 | 1.16797000  | -1.98647900 |
| N | 0.77558800  | 2.04642900  | -1.18484800 | B | -1.54234200 | 2.08709100  | -1.18853900 |
| B | 1.46525200  | 1.06550800  | -1.98987700 | B | -3.65797100 | 1.09676400  | -2.02767900 |
| B | 3.58660800  | 1.98762900  | -1.18534600 | N | -2.97793000 | 2.12464400  | -1.25586700 |
| N | 2.89629300  | 1.12401000  | -2.11303700 | N | -5.10581600 | 1.10702700  | -2.11978400 |
| N | 5.03165700  | 2.07501700  | -1.23248900 | B | -5.83873100 | 1.96037100  | -1.19774900 |
| B | 5.75297800  | 1.10238600  | -2.04119200 | B | 5.00483700  | -1.25413700 | -2.06592400 |
| B | -4.97463300 | 2.05963100  | 1.19371900  | N | 5.68482600  | -0.06285100 | -2.54129700 |
| N | -5.64586200 | 2.54471100  | 0.00001600  | N | 3.55612900  | -1.29952100 | -2.14588400 |
| N | -3.52769700 | 2.14266100  | 1.24942200  | B | 2.84683700  | -0.04212200 | -2.34078300 |
| B | -2.81822300 | 2.38991400  | 0.00001700  | B | 0.69556100  | -1.25770600 | -2.02358200 |
| B | -0.66551300 | 2.01938200  | 1.17268500  | N | 1.39589500  | -0.03143300 | -2.39187900 |
| N | -1.37591000 | 2.51377600  | -0.00000100 | N | -0.74467700 | -1.32734800 | -2.12008200 |
| N | 0.77564600  | 2.04648600  | 1.18477500  | B | -1.47027300 | -0.07889300 | -2.28717300 |
| B | 3.58663300  | 1.98755200  | 1.18529300  | B | -3.61129900 | -1.30887500 | -2.03755100 |
| N | 2.87378500  | 2.47482100  | -0.00000100 | N | -2.90963200 | -0.08921700 | -2.42247100 |
| N | 5.03166800  | 2.07493900  | 1.23246700  | N | -5.05627600 | -1.37704900 | -2.13087100 |
| B | 5.74613900  | 2.36115200  | -0.00000900 | B | -5.79286400 | -0.14683000 | -2.37269100 |
| B | -4.99669000 | -0.02505500 | 2.37309800  | B | 5.01340200  | -2.46191000 | -0.00007300 |
| N | -5.65781800 | 1.25441400  | 2.19082300  | N | 5.68414100  | -2.26450200 | -1.27306200 |
| N | -3.54923700 | -0.04469200 | 2.47057100  | N | 3.56932700  | -2.58624900 | -0.00010200 |
| B | -2.82465000 | 1.14689700  | 2.04717200  | B | 2.85512000  | -2.15045300 | -1.19273700 |
| B | -0.69236300 | -0.09268100 | 2.35333500  | B | 0.70616500  | -2.51904700 | -0.00013700 |
| N | -1.37832300 | 1.17082700  | 2.12084000  | N | 1.41422300  | -2.26206400 | -1.25041100 |
| N | 0.74695600  | -0.11084200 | 2.45050400  | N | -0.73403800 | -2.65561900 | -0.00017400 |
| B | 1.46527000  | 1.06551700  | 1.98983600  | B | -1.44859100 | -2.20406400 | -1.19045700 |
| B | 3.61013400  | -0.12321500 | 2.34146100  | B | -3.60087400 | -2.54011200 | -0.00022600 |
| N | 2.89629600  | 1.12397300  | 2.11299500  | N | -2.88938100 | -2.30219900 | -1.25054300 |
| N | 5.05524300  | -0.11198500 | 2.42963500  | N | -5.04477000 | -2.65394700 | -0.00024800 |
| B | 5.75297600  | 1.10234600  | 2.04121300  | B | -5.75878100 | -2.24907500 | -1.20164100 |
| B | -5.03015300 | -2.10940900 | 1.19335600  | B | 5.00478100  | -1.25440300 | 2.06591200  |
| N | -5.69092000 | -1.28766700 | 2.19204200  | N | 5.68410400  | -2.26468900 | 1.27296200  |
| N | -3.58569600 | -2.23036800 | 1.24939000  | N | 3.55607200  | -1.29979400 | 2.14584000  |
| B | -2.85955900 | -1.26052800 | 2.05763700  | B | 2.85508000  | -2.15060400 | 1.19257200  |
| B | -0.71509800 | -2.19254000 | 1.19582900  | B | 0.69549700  | -1.25792200 | 2.02345100  |
| N | -1.41723600 | -1.33863600 | 2.14946500  | N | 1.41417900  | -2.26220800 | 1.25018500  |
| N | 0.72923800  | -2.30723800 | 1.25206600  | N | -0.74475000 | -1.32752000 | 2.11984800  |
| B | 1.44924300  | -1.32476100 | 2.05563400  | B | -1.44863500 | -2.20411600 | 1.19011000  |
| B | 3.60437400  | -2.21270400 | 1.18891000  | B | -3.61137200 | -1.30896000 | 2.03719600  |
| N | 2.89365400  | -1.37600700 | 2.14607000  | N | -2.88943100 | -2.30220100 | 1.25010300  |
| N | 5.05246800  | -2.29391100 | 1.24011500  | N | -5.05635700 | -1.37713600 | 2.13043000  |
| B | 5.76845400  | -1.32224800 | 2.05127900  | B | -5.75882600 | -2.24909700 | 1.20112700  |
| B | -5.03015700 | -2.10947200 | -1.19335900 | B | 5.02242500  | 1.13731200  | 2.06477600  |
| N | -5.71454400 | -2.57588900 | 0.00001200  | N | 5.68477500  | -0.06316600 | 2.54140700  |
| N | -3.58570000 | -2.23044100 | -1.24939800 | N | 3.57468500  | 1.20155600  | 2.14389500  |
| B | -2.87702000 | -2.47782100 | 0.00000300  | B | 2.84677100  | -0.04240900 | 2.34084400  |
| B | -0.71509300 | -2.19256900 | -1.19582400 | B | 0.69115900  | 1.16869900  | 1.95957500  |
| N | -1.43427900 | -2.61973200 | 0.00000500  | N | 1.39583500  | -0.03172000 | 2.39194500  |
| N | 0.72924900  | -2.30723200 | -1.25204300 | N | -0.76912500 | 1.16782500  | 1.98669600  |
| B | 1.44118800  | -2.54851200 | 0.00001300  | B | -1.47032500 | -0.07905900 | 2.28711400  |
| B | 3.60437800  | -2.21268400 | -1.18886400 | B | -3.65800900 | 1.09677100  | 2.02811700  |
| N | 2.88694300  | -2.65984300 | 0.00001600  | N | -2.90970100 | -0.08940000 | 2.42237000  |
| N | 5.05247500  | -2.29385900 | -1.24004400 | N | -5.10586900 | 1.10697400  | 2.12023000  |

|             |             |             |             |             |             |             |             |
|-------------|-------------|-------------|-------------|-------------|-------------|-------------|-------------|
| B           | 5.76407700  | -2.56072200 | 0.00003400  | B           | -5.79294300 | -0.14697900 | 2.37257400  |
| H           | -6.69735500 | -1.21215300 | -2.08919800 | H           | 6.72007700  | 2.02038900  | 1.21566200  |
| H           | -6.66565500 | 1.20450100  | -2.08623200 | H           | 6.72009600  | 2.02060100  | -1.21539100 |
| H           | -6.65367300 | 2.42891800  | 0.00002600  | H           | 6.69261700  | -0.07039600 | -2.42598600 |
| H           | -6.66563300 | 1.20460200  | 2.08631300  | H           | 6.69132100  | -2.15707400 | -1.21604500 |
| H           | -6.69734800 | -1.21204900 | 2.08917800  | H           | 6.69128700  | -2.15725400 | 1.21598700  |
| H           | -6.71862100 | -2.43110000 | 0.00001100  | H           | 6.69256800  | -0.07071300 | 2.42611600  |
| H           | 6.94710000  | -1.40238600 | -2.19904600 | H           | -7.01846900 | 2.08644600  | 1.29535800  |
| H           | 6.93202000  | 1.19273800  | -2.18005800 | H           | -7.01844500 | 2.08631100  | -1.29479300 |
| H           | 6.91435600  | 2.58453900  | -0.00001100 | H           | -6.96993800 | -0.16978600 | -2.55050400 |
| H           | 6.93203700  | 1.19263800  | 2.17995700  | H           | -6.93199500 | -2.42520500 | -1.30087500 |
| H           | 6.94707100  | -1.40249100 | 2.19924700  | H           | -6.93205600 | -2.42517600 | 1.30027600  |
| H           | 6.93812500  | -2.75710600 | 0.00003200  | H           | -6.97002200 | -0.16999300 | 2.55036700  |
| C           | 1.42785000  | 2.63335500  | -0.00003000 | C           | -0.78739100 | 2.88360800  | 0.00040000  |
| O           | 1.31080700  | 4.01258500  | -0.00023400 | O           | -1.19105700 | 4.18069300  | -0.00126300 |
| <b>IS-7</b> |             |             |             | <b>IS-8</b> |             |             |             |
| B           | 1.78867100  | -2.90232800 | 1.67176100  | B           | -2.75123500 | 1.56924800  | 1.83968300  |
| N           | 2.12381100  | -3.87618800 | 0.64731900  | N           | -3.33904900 | 2.49286300  | 0.88368700  |
| N           | 0.40910600  | -2.46227200 | 1.77703700  | N           | -1.30202100 | 1.51436700  | 1.92587700  |
| B           | -0.47151300 | -2.72610800 | 0.64459700  | B           | -0.54804300 | 2.19296500  | 0.88092000  |
| B           | -2.23997000 | -1.34834900 | 1.72744300  | B           | 1.65628200  | 1.09336400  | 1.82497200  |
| N           | -1.85750200 | -2.30261200 | 0.69334800  | N           | 3.08910400  | 0.94587100  | 1.88947900  |
| N           | -3.61213000 | -0.88333700 | 1.81599900  | B           | 3.86445200  | 1.58387300  | 0.82395100  |
| B           | -4.50127000 | -1.16811400 | 0.70089500  | B           | -2.97472500 | -0.78332300 | 2.22348300  |
| B           | 2.63069500  | -0.72851600 | 2.21279200  | N           | -3.52410000 | 0.53111500  | 2.49315800  |
| N           | 2.81230000  | -2.15707900 | 2.38541400  | N           | -1.53183100 | -0.95317100 | 2.26509800  |
| N           | 1.28975500  | -0.19303800 | 2.33474200  | B           | -0.68988100 | 0.23301400  | 2.25244000  |
| B           | 0.16961600  | -1.12216300 | 2.29235900  | B           | 1.31679100  | -1.28271100 | 2.12108600  |
| B           | -1.39608700 | 0.81266700  | 2.29479400  | N           | 0.76121900  | 0.05801900  | 2.26979900  |
| N           | -1.18394100 | -0.62237400 | 2.42042100  | N           | 2.74730000  | -1.49474000 | 2.22113600  |
| N           | -2.73083900 | 1.36461000  | 2.40195500  | B           | 3.63365600  | -0.34342700 | 2.26450200  |
| B           | -3.85480100 | 0.44366600  | 2.35870500  | B           | -3.17837300 | -2.37823500 | 0.44742000  |
| B           | 3.21320900  | 0.89409500  | 0.51845700  | N           | -3.77783100 | -1.85415200 | 1.66233500  |
| N           | 3.65803500  | 0.14134400  | 1.67534100  | N           | -1.75785700 | -2.66877200 | 0.45712900  |
| N           | 1.86950000  | 1.45304900  | 0.55473000  | B           | -0.95857800 | -2.06132400 | 1.51149900  |
| B           | 0.97108800  | 1.02032200  | 1.60777100  | B           | 1.09853600  | -2.91308000 | 0.40155900  |
| B           | -0.78359900 | 2.39927700  | 0.59953600  | N           | 0.46317700  | -2.31983100 | 1.57045800  |
| N           | -0.32475800 | 1.62484800  | 1.73491200  | N           | 2.52179700  | -3.19089300 | 0.41842500  |
| N           | -2.09676800 | 3.01466000  | 0.64828100  | B           | 3.31501700  | -2.62272200 | 1.49749700  |
| B           | -3.00611000 | 2.61373900  | 1.71032300  | B           | -3.09773900 | -1.57960500 | -1.79400900 |
| B           | 2.94507100  | 0.33373200  | -1.73980400 | N           | -3.86825200 | -2.34753500 | -0.83111800 |
| N           | 3.88820800  | 0.83426500  | -0.76099500 | N           | -1.67348800 | -1.83199600 | -1.89322400 |
| N           | 1.60470000  | 0.89316100  | -1.75300700 | B           | -1.04095800 | -2.57370800 | -0.80900400 |
| B           | -1.04591400 | 1.81250100  | -1.67148200 | B           | 1.17931700  | -2.12289800 | -1.82236100 |
| N           | -0.08794500 | 2.26934400  | -0.67413600 | N           | 0.37568600  | -2.87126000 | -0.86366500 |
| N           | -2.37142500 | 2.40247900  | -1.72298000 | N           | 2.60759600  | -2.35886700 | -1.91689800 |
| B           | -2.80677200 | 3.21547200  | -0.60218800 | B           | 3.24012100  | -3.11200300 | -0.84469100 |
| B           | 2.12183000  | -1.86545800 | -2.29388000 | B           | -2.81532000 | 0.77345400  | -2.17109300 |
| N           | 3.18322800  | -0.89550300 | -2.47812900 | N           | -3.62930400 | -0.39606200 | -2.44667000 |
| N           | 0.75889600  | -1.38445900 | -2.36265200 | N           | -1.37005400 | 0.63116200  | -2.21292900 |
| B           | 0.53629500  | 0.04458500  | -2.24536500 | B           | -0.82145300 | -0.71766600 | -2.28092600 |
| B           | -1.91183900 | -0.34889500 | -2.24559200 | B           | 1.46829000  | 0.21945300  | -2.12340400 |
| N           | -0.79375600 | 0.57292900  | -2.37235300 | N           | 0.60612500  | -0.91570300 | -2.39970200 |
| N           | -3.26757700 | 0.15737500  | -2.31761300 | N           | 2.90697900  | 0.08725200  | -2.24462900 |
| B           | -3.46063700 | 1.59713000  | -2.25146500 | B           | 3.45529600  | -1.25671600 | -2.34453000 |
| B           | 1.53471800  | -3.47957300 | -0.62015100 | B           | -2.66738400 | 2.37207400  | -0.39975200 |

|             |             |             |             |             |             |             |             |
|-------------|-------------|-------------|-------------|-------------|-------------|-------------|-------------|
| N           | 2.34873300  | -3.20769400 | -1.79259100 | N           | -3.37214900 | 1.98821500  | -1.60841300 |
| N           | 0.13996700  | -3.07549800 | -0.63233900 | N           | -1.21400400 | 2.35814300  | -0.40599300 |
| B           | -0.27488600 | -2.12645600 | -1.65630500 | B           | -0.55583200 | 1.53653300  | -1.41613700 |
| B           | -2.49962300 | -1.93687500 | -0.56369700 | B           | 1.73455000  | 1.89394700  | -0.39819100 |
| N           | -1.65251500 | -1.68161600 | -1.72027500 | N           | 0.89310400  | 1.37047300  | -1.44065400 |
| N           | -3.88432600 | -1.50178600 | -0.57288700 | N           | 3.17206000  | 1.78875300  | -0.44875000 |
| B           | -4.30611200 | -0.57552100 | -1.61197700 | B           | 3.76636700  | 1.00384100  | -1.51241800 |
| H           | 3.76037000  | -2.49119900 | 2.24952100  | H           | -4.53035800 | 0.60689900  | 2.39005900  |
| H           | 3.10846500  | -4.11639600 | 0.59930400  | H           | -4.35242700 | 2.47410100  | 0.83917800  |
| H           | 4.57996000  | -0.27091600 | 1.58292400  | H           | -4.77071900 | -1.65471500 | 1.60391000  |
| H           | 3.32213700  | -3.48201100 | -1.71484000 | H           | -4.38433500 | 2.00503300  | -1.54321700 |
| H           | 4.79092200  | 0.37269200  | -0.75108200 | H           | -4.85054300 | -2.09920600 | -0.77807300 |
| H           | 4.12568800  | -1.26012700 | -2.39159200 | H           | -4.62914300 | -0.25608800 | -2.34828900 |
| H           | -4.96557000 | 0.83204900  | 2.54192800  | H           | 4.80897100  | -0.49501000 | 2.38902900  |
| H           | -4.05256900 | 3.16517100  | 1.84788600  | H           | 4.46170900  | -2.91397200 | 1.63005800  |
| H           | -5.66150900 | -0.90863900 | 0.76572900  | H           | 5.04872100  | 1.66816000  | 0.89666700  |
| H           | -3.82601000 | 3.82849700  | -0.64305100 | H           | 4.38347300  | -3.43635300 | -0.91708900 |
| H           | -5.44962600 | -0.25954700 | -1.71611600 | H           | 4.94994700  | 0.94418000  | -1.63644400 |
| H           | -4.54221100 | 2.07031400  | -2.40666200 | H           | 4.61605700  | -1.42433900 | -2.54957000 |
| C           | 1.32750800  | 1.91655900  | -0.73506200 | C           | 1.02862200  | 2.32584100  | 0.99659600  |
| O           | 2.08033500  | 3.05080400  | -0.96859000 | O           | 1.57565400  | 3.49885800  | 1.40445900  |
| C           | 4.36172400  | 3.60617400  | 0.83231700  | C           | 1.16510200  | 4.74723800  | -1.05188200 |
| O           | 4.46403700  | 4.66135900  | 0.43835100  | O           | 0.85573000  | 5.82343500  | -0.89377500 |
| <b>TS-7</b> |             |             |             | <b>TS-8</b> |             |             |             |
| B           | -2.38203100 | -3.01595600 | -0.79472500 | B           | -2.50473600 | 2.18299600  | 1.55319800  |
| N           | -3.00233600 | -3.39615300 | 0.46268800  | N           | -2.99679400 | 3.00825000  | 0.46310900  |
| N           | -0.93400400 | -2.92006000 | -0.84629300 | N           | -1.07293900 | 1.95266200  | 1.63676500  |
| B           | -0.21979100 | -2.83739500 | 0.42352500  | B           | -0.26851100 | 2.33313700  | 0.48346100  |
| B           | 1.89012600  | -2.38623000 | -0.81818700 | B           | 1.79498000  | 1.14884300  | 1.59157600  |
| N           | 1.22607500  | -2.72903600 | 0.43368000  | N           | 3.19989100  | 0.81673000  | 1.66022800  |
| N           | 3.33569500  | -2.26103200 | -0.86430000 | B           | 4.01304700  | 1.13664200  | 0.48621900  |
| B           | 4.05328100  | -2.20209000 | 0.39980600  | B           | -3.02277900 | -0.02757700 | 2.29890200  |
| B           | -2.65914400 | -1.15389200 | -2.27889800 | N           | -3.38684900 | 1.37409900  | 2.37230800  |
| N           | -3.15563000 | -2.46032300 | -1.89263800 | N           | -1.61400600 | -0.38109000 | 2.35535000  |
| N           | -1.22693800 | -0.97094500 | -2.38128700 | B           | -0.62459200 | 0.66788800  | 2.15989700  |
| B           | -0.35738800 | -1.98296300 | -1.80045900 | B           | 1.16236400  | -1.09972600 | 2.23768400  |
| B           | 1.60929200  | -0.54915900 | -2.31867200 | N           | 0.79173800  | 0.31002400  | 2.19626900  |
| N           | 1.08088800  | -1.83834300 | -1.89793500 | N           | 2.55541000  | -1.48345000 | 2.35412900  |
| N           | 3.04005500  | -0.34441300 | -2.41793300 | B           | 3.58256700  | -0.46311500 | 2.22632000  |
| B           | 3.91519900  | -1.34973100 | -1.83850800 | B           | -3.48341500 | -1.82700100 | 0.78402900  |
| B           | -2.96480700 | 1.11044600  | -1.49728600 | N           | -3.97403700 | -1.05242300 | 1.91026500  |
| N           | -3.49186300 | 0.03280100  | -2.31520600 | N           | -2.11266100 | -2.29718000 | 0.82479600  |
| N           | -1.53430800 | 1.35855400  | -1.53983400 | B           | -1.21082800 | -1.65169200 | 1.76644800  |
| B           | -0.68889200 | 0.35888700  | -2.16237400 | B           | 0.68575900  | -2.92563600 | 0.78204000  |
| B           | 1.26053900  | 1.68886100  | -1.52473300 | N           | 0.16705500  | -2.08306900 | 1.84992100  |
| N           | 0.71811400  | 0.60168500  | -2.31236700 | N           | 2.06153700  | -3.38215900 | 0.82803300  |
| N           | 2.68108900  | 1.97853200  | -1.59838100 | B           | 2.95469600  | -2.76633900 | 1.79550700  |
| B           | 3.54829400  | 1.00637900  | -2.24393300 | B           | -3.36909100 | -1.41378200 | -1.56060100 |
| B           | -3.00163700 | 1.50508400  | 0.79953400  | N           | -4.20196500 | -1.90398800 | -0.47604500 |
| N           | -3.73147100 | 1.72365400  | -0.43350200 | N           | -1.99377900 | -1.86749800 | -1.63157300 |
| N           | -1.57435200 | 1.76058300  | 0.80494200  | B           | -1.42901400 | -2.50225900 | -0.44672600 |
| B           | 1.21309700  | 2.08659300  | 0.80107500  | B           | 0.79678900  | -2.52284900 | -1.54407600 |
| N           | 0.46454500  | 2.24192700  | -0.43876500 | N           | -0.06541700 | -2.99017600 | -0.46559600 |
| N           | 2.63114600  | 2.39797300  | 0.83048900  | N           | 2.17802500  | -2.95985600 | -1.61359000 |
| B           | 3.32349000  | 2.56342100  | -0.43516600 | B           | 2.74184400  | -3.60736100 | -0.43875200 |
| B           | -2.74967700 | -0.36407600 | 2.30856800  | B           | -2.79450800 | 0.78857400  | -2.30475000 |

|            |             |             |             |            |             |             |             |
|------------|-------------|-------------|-------------|------------|-------------|-------------|-------------|
| N          | -3.57203100 | 0.76144300  | 1.91063300  | N          | -3.76205800 | -0.28982200 | -2.39300600 |
| N          | -1.32218100 | -0.14941300 | 2.40325100  | N          | -1.38191600 | 0.45087400  | -2.34422600 |
| B          | -0.76967100 | 1.02855500  | 1.75907100  | B          | -1.01635400 | -0.95318800 | -2.20385800 |
| B          | 1.51653100  | 0.24633800  | 2.31066800  | B          | 1.38077800  | -0.31844200 | -2.21989000 |
| N          | 0.63332800  | 1.31884700  | 1.88084500  | N          | 0.36899700  | -1.35707800 | -2.30642000 |
| N          | 2.94387500  | 0.48359300  | 2.39271500  | N          | 2.78595600  | -0.65847000 | -2.32917700 |
| B          | 3.46606000  | 1.70234400  | 1.79709300  | B          | 3.14913100  | -2.06306700 | -2.22053000 |
| B          | -2.42974400 | -2.61286800 | 1.54452800  | B          | -2.38613700 | 2.59523500  | -0.78921300 |
| N          | -3.24215900 | -1.72777300 | 2.36191400  | N          | -3.17182000 | 2.13419800  | -1.91759700 |
| N          | -0.98425300 | -2.49623900 | 1.61814500  | N          | -0.94944400 | 2.37802400  | -0.80518300 |
| B          | -0.43836600 | -1.29153700 | 2.22810500  | B          | -0.43512100 | 1.34372700  | -1.69484600 |
| B          | 1.84305200  | -1.98389200 | 1.52476400  | B          | 1.90001900  | 1.53633600  | -0.75277100 |
| N          | 0.99638400  | -1.11377900 | 2.32885600  | N          | 0.97992800  | 0.98768100  | -1.71264300 |
| N          | 3.28640200  | -1.83972600 | 1.58158800  | N          | 3.31275100  | 1.22792400  | -0.79583700 |
| B          | 3.83412200  | -0.65213600 | 2.21681700  | B          | 3.77532600  | 0.22867200  | -1.73843100 |
| H          | -4.16221400 | -2.52711000 | -1.78697600 | H          | -4.37685000 | 1.56517300  | 2.26151000  |
| H          | -4.01673900 | -3.40993900 | 0.44444700  | H          | -4.00458300 | 3.12033000  | 0.43130400  |
| H          | -4.48772700 | -0.12788800 | -2.21076700 | H          | -4.93478100 | -0.73627200 | 1.83294300  |
| H          | -4.24435700 | -1.83110600 | 2.24438100  | H          | -4.17073400 | 2.29443200  | -1.84352000 |
| H          | -4.71248200 | 1.46863000  | -0.40592900 | H          | -5.14232000 | -1.52385900 | -0.45438600 |
| H          | -4.56369100 | 0.56831500  | 1.82259500  | H          | -4.73080400 | -0.00240200 | -2.30366400 |
| H          | 5.09580100  | -1.28206900 | -1.97941300 | H          | 4.73052800  | -0.74756400 | 2.37124000  |
| H          | 4.70227300  | 1.24638400  | -2.41450200 | H          | 4.06147100  | -3.17609900 | 1.95121500  |
| H          | 5.24362300  | -2.21437600 | 0.42565900  | H          | 5.19971900  | 1.05976500  | 0.52650000  |
| H          | 4.45173000  | 2.93978600  | -0.47649800 | H          | 3.83062000  | -4.08846800 | -0.46921500 |
| H          | 5.00879900  | -0.53345200 | 2.37326900  | H          | 4.93766300  | -0.00626500 | -1.85586700 |
| H          | 4.61414200  | 1.99423800  | 1.92141100  | H          | 4.27058800  | -2.41604800 | -2.40782700 |
| C          | -0.99321000 | 2.21658700  | -0.46752600 | C          | 1.31250400  | 2.26205200  | 0.54862700  |
| O          | -1.47533100 | 3.47504900  | -0.82741500 | O          | 2.00201900  | 3.45338500  | 0.79966700  |
| C          | -0.94126700 | 4.75496700  | 0.54833700  | C          | 2.27587400  | 4.46367300  | -0.69377100 |
| O          | -1.30522400 | 5.82718300  | 0.45932200  | O          | 2.72484500  | 5.50453800  | -0.55535600 |
| <b>P-7</b> |             |             |             | <b>P-8</b> |             |             |             |
| B          | 2.21998500  | -3.23234300 | 0.31986400  | B          | 3.20730500  | 0.86792200  | -0.76231500 |
| N          | 2.87455300  | -3.37649200 | -0.96941800 | N          | 3.91874200  | 0.89712300  | 0.51064400  |
| N          | 0.77540700  | -3.08372100 | 0.34308600  | N          | 1.90314200  | 1.50218100  | -0.81131600 |
| B          | 0.11644600  | -2.70876100 | -0.90362300 | B          | 1.27349200  | 1.82056300  | 0.47363900  |
| B          | -2.02553500 | -2.43315800 | 0.33412300  | B          | -0.92074200 | 2.43679900  | -0.84299200 |
| N          | -1.32298400 | -2.53746400 | -0.93991100 | N          | -2.27936700 | 2.94825800  | -0.88052000 |
| N          | -3.46574000 | -2.25392800 | 0.35745500  | B          | -2.95726600 | 3.18912800  | 0.39145500  |
| B          | -4.12780900 | -1.90321800 | -0.88939100 | B          | 2.55809100  | -0.85262300 | -2.28489000 |
| B          | 2.50703700  | -1.72740500 | 2.16396400  | N          | 3.62500300  | 0.03870500  | -1.87176400 |
| N          | 2.97098900  | -2.94714600 | 1.53080800  | N          | 1.20750000  | -0.32326600 | -2.36884200 |
| N          | 1.07630100  | -1.51833000 | 2.26453600  | B          | 0.91849400  | 0.96551800  | -1.75256100 |
| B          | 0.19292500  | -2.34530600 | 1.45433200  | B          | -1.50202000 | 0.62200300  | -2.32099000 |
| B          | -1.73940600 | -0.95354800 | 2.18198400  | N          | -0.43828400 | 1.50355200  | -1.85267200 |
| N          | -1.24271600 | -2.15789200 | 1.53112100  | N          | -2.85938000 | 1.12039900  | -2.45436000 |
| N          | -3.16287800 | -0.69893000 | 2.27066200  | B          | -3.19466800 | 2.40814500  | -1.87042800 |
| B          | -4.05129700 | -1.52804000 | 1.47305200  | B          | 1.77295400  | -2.97573100 | -1.51777500 |
| B          | 2.91550700  | 0.64379900  | 1.88158400  | N          | 2.74406200  | -2.29103100 | -2.35291000 |
| N          | 3.37662300  | -0.60576000 | 2.46471900  | N          | 0.38751200  | -2.56044900 | -1.60478400 |
| N          | 1.49839000  | 0.92795900  | 1.92389500  | B          | 0.10815900  | -1.26678600 | -2.21264500 |
| B          | 0.59913400  | -0.15133800 | 2.30594800  | B          | -2.27672900 | -1.50729700 | -1.55898100 |
| B          | -1.26835800 | 1.38405000  | 1.88208000  | N          | -1.25872000 | -0.81224900 | -2.33458000 |
| N          | -0.80167700 | 0.12858400  | 2.43790700  | N          | -3.66237800 | -1.08878500 | -1.64632000 |
| N          | -2.67456300 | 1.72894500  | 1.97730800  | B          | -3.95290900 | 0.17119900  | -2.31004600 |
| B          | -3.60726500 | 0.68350900  | 2.36587200  | B          | 1.60501200  | -3.36377500 | 0.83325100  |

|             |             |             |             |              |             |             |             |
|-------------|-------------|-------------|-------------|--------------|-------------|-------------|-------------|
| B           | 3.07545000  | 1.50656200  | -0.27955100 | N            | 2.16666400  | -3.84033200 | -0.41882000 |
| N           | 3.73774900  | 1.46586500  | 1.01119100  | N            | 0.21106000  | -2.96787200 | 0.85507500  |
| N           | 1.65942600  | 1.80727300  | -0.29356100 | B            | -0.44827700 | -2.74563500 | -0.42507000 |
| B           | -1.10447700 | 2.27223900  | -0.29648500 | B            | -2.44718300 | -1.89733600 | 0.77810600  |
| N           | -0.38948000 | 2.11476700  | 0.97282000  | N            | -1.84334700 | -2.36346300 | -0.46271000 |
| N           | -2.50388300 | 2.65215400  | -0.30463900 | N            | -3.84072700 | -1.49603000 | 0.79772800  |
| B           | -3.24430700 | 2.57477600  | 0.94251300  | B            | -4.50646400 | -1.28586600 | -0.47807100 |
| B           | 2.81867500  | -0.01317400 | -2.14815100 | B            | 2.21846800  | -1.62722800 | 2.36297000  |
| N           | 3.66323200  | 0.97202400  | -1.49723400 | N            | 2.43366700  | -3.00917200 | 1.97134900  |
| N           | 1.40254200  | 0.27595700  | -2.25789500 | N            | 0.85476300  | -1.13046300 | 2.42857500  |
| B           | 0.86625900  | 1.32451000  | -1.41538700 | B            | -0.18561400 | -1.94155600 | 1.80905500  |
| B           | -1.42417400 | 0.77425900  | -2.15658500 | B            | -1.84265300 | -0.15517200 | 2.29970600  |
| N           | -0.51593300 | 1.69382800  | -1.49170600 | N            | -1.56769600 | -1.51925300 | 1.87457900  |
| N           | -2.83588200 | 1.09162100  | -2.22310100 | N            | -3.21705900 | 0.30357000  | 2.39636200  |
| B           | -3.32833400 | 2.19541400  | -1.41157900 | B            | -4.25442600 | -0.51590100 | 1.78817800  |
| B           | 2.37908600  | -2.35620400 | -1.87762000 | B            | 3.03228200  | 0.48189900  | 1.59234500  |
| N           | 3.26135100  | -1.35835000 | -2.45876100 | N            | 3.30998500  | -0.67216500 | 2.42404000  |
| N           | 0.94314000  | -2.16162000 | -1.97398300 | N            | 1.71417000  | 1.07805800  | 1.64905400  |
| B           | 0.46694500  | -0.83639000 | -2.34396100 | B            | 0.62319400  | 0.29500900  | 2.22412300  |
| B           | -1.86630100 | -1.55205600 | -1.86824300 | B            | -1.09962700 | 2.02613600  | 1.59071200  |
| N           | -0.95489000 | -0.57453600 | -2.44483000 | N            | -0.74553200 | 0.80497800  | 2.30127200  |
| N           | -3.29960200 | -1.33277900 | -1.93970000 | N            | -2.46286200 | 2.52806600  | 1.59640800  |
| B           | -3.77640200 | -0.01199500 | -2.31860000 | B            | -3.49600500 | 1.71918900  | 2.21946300  |
| H           | 3.97790800  | -3.03344300 | 1.44331000  | H            | 4.53827000  | -0.39194300 | -1.77580800 |
| H           | 3.88605800  | -3.44242500 | -0.92165300 | H            | 4.82482800  | 0.44008700  | 0.49998800  |
| H           | 4.37108600  | -0.77973900 | 2.37055800  | H            | 3.70327700  | -2.60078500 | -2.23876500 |
| H           | 4.25206900  | -1.53075800 | -2.32644700 | H            | 4.23578200  | -1.07237700 | 2.31614600  |
| H           | 4.72097000  | 1.21816400  | 0.98369300  | H            | 3.15408000  | -4.07076300 | -0.38625500 |
| H           | 4.64571500  | 0.73118800  | -1.42618700 | H            | 3.40730400  | -3.28406000 | 1.89715500  |
| H           | -5.23330500 | -1.43619700 | 1.58545400  | H            | -4.27628100 | 2.88041000  | -2.03057400 |
| H           | -4.75845000 | 0.93678700  | 2.53673700  | H            | -5.07701100 | 0.50515500  | -2.51653700 |
| H           | -5.31570900 | -1.86375400 | -0.95858300 | H            | -4.02971500 | 3.70941600  | 0.40003800  |
| H           | -4.35891600 | 2.98366100  | 1.02488900  | H            | -5.67314600 | -1.05074400 | -0.52345800 |
| H           | -4.93918600 | 0.19168200  | -2.47652200 | H            | -4.59958300 | 2.14086000  | 2.37108400  |
| H           | -4.46035300 | 2.55289800  | -1.50808800 | H            | -5.40432900 | -0.23705700 | 1.92317300  |
| C           | 0.99726300  | 1.88028600  | 0.97988700  | C            | -0.12063300 | 2.47664400  | 0.48001600  |
| O           | 2.75075400  | 4.68709800  | 0.05665000  | O            | 3.00397900  | 3.94845000  | 0.81908000  |
| C           | 1.62599400  | 4.64158700  | -0.23243300 | C            | 3.75710500  | 3.77669600  | -0.05198500 |
| O           | 0.50141000  | 4.63109700  | -0.53514700 | O            | 4.50938600  | 3.62857500  | -0.92582600 |
| <b>IS-9</b> |             |             |             | <b>IS-10</b> |             |             |             |
| H           | 4.58187100  | 0.28571200  | -0.49760500 | H            | -4.60718200 | -0.26412000 | 2.03717900  |
| H           | 4.02249000  | -1.43139800 | -2.07355900 | H            | -4.74210700 | -1.99707300 | 0.40844200  |
| H           | 4.31401200  | -0.57899500 | 1.70130600  | H            | -4.46763800 | 1.84017400  | 0.88511000  |
| H           | 3.45022700  | -3.42854100 | -0.83145600 | H            | -4.66680600 | -0.95239200 | -1.77309400 |
| H           | 3.63898200  | -2.90737200 | 1.47543800  | H            | -4.48058700 | 1.40186600  | -1.46819000 |
| H           | -4.17704500 | 3.23951700  | -0.46449600 | H            | 4.72140800  | -1.11895200 | 2.02639700  |
| H           | -4.81177100 | 1.31323100  | -2.12565300 | H            | 4.46647900  | -3.06516800 | 0.34725900  |
| H           | -4.50263400 | 2.18163200  | 1.91463400  | H            | 4.91420400  | 1.35470700  | 0.98931100  |
| H           | -5.49100900 | -0.85801600 | -0.81237100 | H            | 4.54598000  | -1.93609000 | -2.05537900 |
| H           | -5.29549200 | -0.31187000 | 1.73436300  | H            | 4.84565000  | 0.58768800  | -1.57614100 |
| B           | -3.14016000 | 2.65792900  | -0.41806200 | B            | 3.54788900  | -0.95903900 | 1.89309200  |
| B           | -3.69715800 | 0.93966300  | -1.93598400 | B            | 3.32899100  | -2.71822800 | 0.30583900  |
| B           | -4.31449100 | -1.02149100 | -0.73438200 | B            | 3.40176200  | -1.71378600 | -1.81651500 |
| B           | -3.41616900 | 1.72760300  | 1.73768900  | B            | 3.74241000  | 1.19103100  | 0.87167800  |
| B           | -4.13886100 | -0.53079100 | 1.55714200  | B            | 3.66204800  | 0.62297500  | -1.43930900 |
| B           | -1.74031400 | -0.08431700 | 1.98988600  | B            | 1.62116200  | 1.49887900  | -0.34956600 |

|             |             |             |             |              |             |             |             |
|-------------|-------------|-------------|-------------|--------------|-------------|-------------|-------------|
| B           | -2.28478800 | -1.77697600 | 0.47797500  | B            | 1.38561000  | -0.28618000 | -1.91723200 |
| B           | -2.02115100 | -0.86674400 | -1.66201000 | B            | 1.19465200  | -2.35791700 | -0.89632200 |
| B           | -1.12651200 | 1.85117900  | 0.78771500  | B            | 1.55009000  | 0.49566400  | 1.75460500  |
| B           | -1.29667700 | 1.37376300  | -1.47272900 | B            | 1.27205900  | -1.84264100 | 1.36431800  |
| B           | 0.37094700  | -0.35164200 | -1.92911400 | B            | -0.77248800 | -0.49388800 | 1.91213900  |
| B           | 0.65110900  | 0.42745500  | 1.64696400  | B            | -0.93617500 | -2.27868300 | 0.35357700  |
| B           | -0.20826500 | -2.30580100 | -0.76613600 | B            | -0.66994200 | 1.65300800  | 0.93308700  |
| B           | -0.03065200 | -1.81283900 | 1.50854500  | B            | -0.86280000 | -1.28125200 | -1.74684500 |
| B           | 2.37045100  | -1.31560900 | 1.93135400  | B            | -0.65763800 | 1.05322600  | -1.34358000 |
| B           | 1.83681400  | -3.02641000 | 0.42867700  | B            | -2.78094600 | 1.84928700  | -0.34569400 |
| B           | 2.08385400  | -2.12108700 | -1.70759900 | B            | -2.89357500 | 0.13469800  | -1.93149700 |
| B           | 2.93459600  | 0.64546800  | 0.73381100  | B            | -3.07033900 | -1.93436300 | -0.84419600 |
| B           | 2.76789200  | 0.13130400  | -1.50952300 | B            | -2.85760900 | 0.84120200  | 1.76372300  |
| N           | -2.46951800 | 2.39634000  | 0.85088600  | B            | -3.01276600 | -1.47304200 | 1.44686400  |
| N           | -2.65165400 | 1.88513400  | -1.55494900 | N            | 2.98378200  | 0.37986900  | 1.83675300  |
| N           | -3.41366800 | -0.48001300 | -1.74794600 | N            | 2.70170900  | -2.06441800 | 1.45294900  |
| N           | -3.69953100 | -1.45781400 | 0.51665900  | N            | 2.61873700  | -2.61076500 | -0.96768500 |
| N           | -3.11669200 | 0.34928400  | 2.11588600  | N            | 2.82312300  | -0.39450100 | -2.06415600 |
| N           | -0.68961600 | 0.91444600  | 1.80822300  | N            | 3.06101300  | 1.44910800  | -0.40535300 |
| N           | -1.62191100 | -1.98933000 | -0.81095700 | N            | 0.55986000  | -1.49093400 | -1.89290500 |
| N           | -1.43470800 | -1.47056800 | 1.63051700  | N            | 0.79379200  | 0.94306100  | -1.39273000 |
| N           | -0.38056400 | 1.91492900  | -0.46870800 | N            | 0.67934400  | -0.63994400 | 1.95165300  |
| N           | -0.98756600 | 0.08338400  | -2.07343600 | N            | 0.48175000  | -2.56116100 | 0.36707600  |
| N           | 1.57085900  | 1.14193100  | 0.76979200  | N            | -1.40959300 | 0.82302500  | 1.88410500  |
| N           | 1.39878500  | 0.61722700  | -1.56287700 | N            | -1.57177200 | -1.65069300 | 1.51414300  |
| N           | 0.98363400  | -0.92397700 | 2.07487400  | N            | -1.32779300 | 1.89866100  | -0.35228300 |
| N           | 0.68116400  | -1.76797500 | -1.79559900 | N            | -1.64843000 | -2.20064800 | -0.92303100 |
| N           | 0.40819000  | -2.76132700 | 0.48199300  | N            | -1.44755200 | 0.03254900  | -2.02851200 |
| N           | 2.65110000  | -2.70617500 | 1.59711100  | N            | -3.46901700 | 1.41956400  | -1.55611500 |
| N           | 2.44975500  | -3.25982600 | -0.87661500 | N            | -3.66801400 | -1.10007800 | -1.88182300 |
| N           | 3.35811200  | -0.25292800 | 1.80488300  | N            | -3.45539700 | 1.89244300  | 0.94733400  |
| N           | 3.05513500  | -1.13786600 | -2.16827300 | N            | -3.74777100 | -2.20333300 | 0.42006800  |
| N           | 3.66276700  | 0.71526500  | -0.52819600 | N            | -3.60233700 | -0.34685800 | 2.15871300  |
| C           | 1.04730900  | 1.61567000  | -0.52540800 | C            | 0.90537200  | 1.81546400  | 1.08069800  |
| O           | 1.72997400  | 2.73643500  | -0.94896000 | O            | 1.44095300  | 2.95368300  | 1.57658200  |
| C           | 4.00315400  | 3.45338900  | 0.86772200  | O            | 1.04190900  | 4.28074300  | -0.91363700 |
| O           | 4.23087300  | 4.35200000  | 0.21915300  | O            | 0.72615800  | 5.36416000  | -0.84427000 |
| <b>TS-9</b> |             |             |             | <b>TS-10</b> |             |             |             |
| H           | -4.57520500 | 1.18012400  | -0.34157900 | H            | -4.58400700 | 0.66495200  | 1.99345000  |
| H           | -4.43905600 | 0.16911800  | 1.81038400  | H            | -4.94207400 | -1.37710200 | 0.82666000  |
| H           | -4.39521000 | -0.54143300 | -1.99593500 | H            | -4.27374900 | 2.44040000  | 0.41105700  |
| H           | -4.23510100 | -2.22889100 | 1.49426700  | H            | -4.84344300 | -0.87300300 | -1.52853900 |
| H           | -4.20377800 | -2.66052100 | -0.83721500 | H            | -4.42169000 | 1.45775800  | -1.76786200 |
| H           | 4.60007800  | 2.32969300  | -0.43193100 | H            | 4.60636000  | -1.11543900 | 2.11482600  |
| H           | 4.74330700  | 1.17253300  | 1.91450400  | H            | 4.11753100  | -3.34667000 | 0.90968700  |
| H           | 4.79798500  | 0.41802400  | -2.21664400 | H            | 5.00774300  | 0.94392200  | 0.49170600  |
| H           | 5.03526200  | -1.41875700 | 1.59076000  | H            | 4.22524800  | -2.81264300 | -1.67948000 |
| H           | 5.07048900  | -1.87583700 | -0.97390900 | H            | 4.77158000  | -0.28339200 | -1.85122600 |
| B           | 3.46496400  | 1.97599400  | -0.38313500 | B            | 3.45228200  | -0.86929900 | 1.94953400  |
| B           | 3.58918700  | 0.93827500  | 1.73817400  | B            | 3.01554000  | -2.91036200 | 0.80340200  |
| B           | 3.85430400  | -1.40289400 | 1.44089100  | B            | 3.11214200  | -2.43501700 | -1.49357800 |
| B           | 3.63867200  | 0.25986400  | -1.99567500 | B            | 3.81959500  | 0.92145400  | 0.44004000  |
| B           | 3.88540900  | -1.82021000 | -0.87534800 | B            | 3.60333800  | -0.11292000 | -1.68994600 |
| B           | 1.64751000  | -1.19467700 | -1.73553200 | B            | 1.68917900  | 1.18494500  | -0.78742000 |
| B           | 1.77141500  | -2.21887000 | 0.36486900  | B            | 1.23693700  | -0.87685300 | -1.90832700 |
| B           | 1.59794600  | -0.52121100 | 1.96136700  | B            | 0.88512000  | -2.62545300 | -0.42714400 |

|            |             |             |             |             |             |             |             |
|------------|-------------|-------------|-------------|-------------|-------------|-------------|-------------|
| B          | 1.38147300  | 1.13044100  | -1.43593500 | B           | 1.59933600  | 0.72022300  | 1.50276000  |
| B          | 1.35145900  | 1.54285700  | 0.84657800  | B           | 1.08765500  | -1.61349300 | 1.65247800  |
| B          | -0.65308100 | 0.45738500  | 1.70240800  | B           | -0.79706000 | 0.02293800  | 1.90024200  |
| B          | -0.60290900 | -0.20768700 | -1.91127600 | B           | -1.18509200 | -2.04713400 | 0.79590100  |
| B          | -0.42464900 | -1.86336100 | 1.45776800  | B           | -0.51573500 | 1.85536500  | 0.45267800  |
| B          | -0.39430800 | -2.28259300 | -0.83873800 | B           | -1.09023200 | -1.57386600 | -1.47806600 |
| B          | -2.62414100 | -1.61508900 | -1.70761700 | B           | -0.64760800 | 0.75727600  | -1.63028200 |
| B          | -2.51532800 | -2.64387200 | 0.38690200  | B           | -2.64352400 | 1.97606900  | -0.80855600 |
| B          | -2.67097900 | -0.93446200 | 1.97147600  | B           | -2.98210200 | -0.03824300 | -1.95541500 |
| B          | -2.84414300 | 0.71932400  | -1.40701500 | B           | -3.31683200 | -1.77760800 | -0.42448000 |
| B          | -2.86389600 | 1.13932400  | 0.85213200  | B           | -2.74309900 | 1.49729200  | 1.47280100  |
| N          | 2.80960700  | 1.37087900  | -1.53606500 | B           | -3.13586700 | -0.80329800 | 1.69357400  |
| N          | 2.77761500  | 1.80881500  | 0.89219000  | N           | 3.02045600  | 0.47383000  | 1.58913900  |
| N          | 3.03452400  | -0.37163000 | 2.07060300  | N           | 2.49092800  | -1.95189700 | 1.77448600  |
| N          | 3.22181600  | -2.17578000 | 0.37542800  | N           | 2.27582500  | -3.03034700 | -0.45171800 |
| N          | 3.08644400  | -1.08444700 | -1.85053900 | N           | 2.65116900  | -1.16174100 | -2.04235300 |
| N          | 0.81205100  | -0.04393800 | -2.07996400 | N           | 3.11847000  | 0.97300000  | -0.85090100 |
| N          | 1.02121800  | -1.80314300 | 1.55112500  | N           | 0.30081200  | -1.95269000 | -1.59052700 |
| N          | 1.05340800  | -2.24795500 | -0.91069100 | N           | 0.78559100  | 0.49446500  | -1.67756600 |
| N          | 0.61174200  | 1.79780800  | -0.38837900 | N           | 0.63419900  | -0.25596200 | 1.95483700  |
| N          | 0.75981100  | 0.67158800  | 1.84798200  | N           | 0.19969600  | -2.45775400 | 0.85764700  |
| N          | -1.40871600 | 0.92573600  | -1.47569100 | N           | -1.30068500 | 1.35971300  | 1.58380900  |
| N          | -1.43248100 | 1.36632000  | 0.87325800  | N           | -1.71700300 | -1.10541600 | 1.78430000  |
| N          | -1.18209600 | -1.54214100 | -1.82374900 | N           | -1.19448800 | 1.86533600  | -0.84521300 |
| N          | -1.23284200 | -0.82276200 | 2.09286000  | N           | -1.93054700 | -2.19884200 | -0.45481300 |
| N          | -1.06183500 | -2.66075000 | 0.40793300  | N           | -1.55717700 | -0.30719800 | -2.04690700 |
| N          | -3.19112700 | -2.69198300 | -0.90645600 | N           | -3.41729600 | 1.34936600  | -1.87207800 |
| N          | -3.22451200 | -2.22850400 | 1.59353000  | N           | -3.86928500 | -1.14544400 | -1.61833800 |
| N          | -3.39063200 | -0.44102300 | -2.10412600 | N           | -3.25973800 | 2.39639900  | 0.44602800  |
| N          | -3.43694000 | 0.30295600  | 1.90476800  | N           | -3.97234000 | -1.67470900 | 0.87592300  |
| N          | -3.59003800 | 1.42162100  | -0.37685800 | N           | -3.58964400 | 0.51031600  | 2.12903300  |
| C          | -0.84752800 | 1.79751100  | -0.41397300 | C           | 1.07042100  | 1.87654300  | 0.52296600  |
| O          | -1.30799200 | 3.05201200  | -0.79633800 | O           | 1.70698900  | 3.07730700  | 0.83530900  |
| C          | -0.70994000 | 4.38531700  | 0.50642800  | C           | 1.93450400  | 4.17978400  | -0.60161100 |
| O          | -0.97420900 | 5.47356400  | 0.31771100  | O           | 2.34357400  | 5.22771800  | -0.40567100 |
| <b>P-9</b> |             |             |             | <b>P-10</b> |             |             |             |
| H          | 4.55162500  | 0.99564600  | 0.98732400  | H           | 4.33115200  | -0.68306900 | -1.73004300 |
| H          | 4.50290900  | 0.60045200  | -1.42787900 | H           | 3.62859800  | -2.93923200 | -1.45923500 |
| H          | 4.30847600  | -1.20930500 | 2.03052100  | H           | 4.62999200  | 0.34948700  | 0.42331100  |
| H          | 4.26062700  | -1.79790600 | -1.80878300 | H           | 3.48629700  | -3.36422600 | 0.90429400  |
| H          | 4.14118800  | -2.88571400 | 0.27195900  | H           | 4.09670700  | -1.36120300 | 2.03245000  |
| H          | -4.58136300 | 2.18654000  | 1.09077200  | H           | -4.63845600 | 1.98899700  | -2.01687400 |
| H          | -4.66174200 | 1.77947300  | -1.47415000 | H           | -5.30984900 | -0.49564700 | -1.68881700 |
| H          | -4.87058400 | -0.14579100 | 2.21716200  | H           | -4.39386000 | 3.04294700  | 0.35621500  |
| H          | -5.00399300 | -0.78088400 | -1.94622400 | H           | -5.47274600 | -0.96702900 | 0.90979100  |
| H          | -5.13481700 | -1.98424600 | 0.36026900  | H           | -4.89659600 | 1.23429900  | 2.16216500  |
| B          | -3.44898000 | 1.84042500  | 0.97282000  | B           | -3.53296700 | 1.60004200  | -1.80472900 |
| B          | -3.51599400 | 1.48197800  | -1.34625900 | B           | -4.14536600 | -0.66427200 | -1.50650100 |
| B          | -3.82893400 | -0.83854100 | -1.76397200 | B           | -4.29136900 | -1.08568000 | 0.82277200  |
| B          | -3.70620000 | -0.26287700 | 1.99801400  | B           | -3.29934400 | 2.57158300  | 0.33713500  |
| B          | -3.94680900 | -1.92384500 | 0.31489000  | B           | -3.76625200 | 0.91817100  | 1.96070600  |
| B          | -1.73208800 | -1.64049000 | 1.38246800  | B           | -1.38421600 | 1.47707500  | 1.48969400  |
| B          | -1.79484100 | -1.99053200 | -0.92380700 | B           | -1.99200500 | -0.81356800 | 1.71236100  |
| B          | -1.54371000 | 0.09558300  | -1.94304800 | B           | -2.25255000 | -1.80341700 | -0.38728000 |
| B          | -1.42196700 | 0.65275900  | 1.78679000  | B           | -1.23749300 | 1.91108300  | -0.88753100 |
| B          | -1.30282200 | 1.74431800  | -0.27765000 | B           | -1.76252100 | -0.14557600 | -1.96165800 |

|              |             |             |             |              |             |             |             |
|--------------|-------------|-------------|-------------|--------------|-------------|-------------|-------------|
| B            | 0.70920100  | 0.90358200  | -1.39478700 | B            | 0.65217400  | 0.44771000  | -1.68975200 |
| B            | 0.52324100  | -0.82852600 | 1.92951700  | B            | -0.01816900 | -1.81819700 | -1.43971700 |
| B            | 0.44583200  | -1.38697400 | -1.80186400 | B            | 1.00934300  | 1.48914400  | 0.40884100  |
| B            | 0.32906300  | -2.46769500 | 0.26866400  | B            | -0.16108700 | -2.23822600 | 0.85278200  |
| B            | 2.54087000  | -2.12177300 | 1.36520100  | B            | 0.42386800  | -0.21856900 | 1.94716100  |
| B            | 2.49221800  | -2.48585900 | -0.93881100 | B            | 2.82793000  | 0.20321900  | 1.47802400  |
| B            | 2.72884800  | -0.38947700 | -1.94657100 | B            | 2.13646000  | -2.01732900 | 1.75117700  |
| B            | 2.78694600  | 0.19923600  | 1.77383800  | B            | 1.85878500  | -3.00322600 | -0.35261700 |
| B            | 2.90494600  | 1.27185900  | -0.26627400 | B            | 2.97314400  | 0.61599500  | -0.82244500 |
| N            | -2.84067500 | 0.91091000  | 1.91968700  | B            | 2.36360700  | -1.35192900 | -1.92899400 |
| N            | -2.71572300 | 2.05806900  | -0.26878500 | N            | -2.62226800 | 2.34633800  | -0.94371500 |
| N            | -2.97093000 | 0.31082200  | -2.03288600 | N            | -3.15697800 | 0.22413900  | -2.11353500 |
| N            | -3.24403600 | -1.91233300 | -0.96480600 | N            | -3.67331200 | -1.52520100 | -0.42521900 |
| N            | -3.17016500 | -1.52351700 | 1.48449800  | N            | -3.40213000 | -0.48712200 | 1.81541400  |
| N            | -0.88737800 | -0.67249500 | 2.08641700  | N            | -2.77476700 | 1.89594400  | 1.52658800  |
| N            | -0.99472000 | -1.26248400 | -1.91036600 | N            | -1.57750100 | -1.95864500 | 0.90149400  |
| N            | -1.12003700 | -2.41751400 | 0.30353300  | N            | -0.97715300 | 0.18649900  | 2.04639800  |
| N            | -0.57358900 | 1.55501400  | 0.99172100  | N            | -0.73682600 | 0.88797800  | -1.80672000 |
| N            | -0.68615100 | 1.18774700  | -1.47964900 | N            | -1.42359400 | -1.50898500 | -1.55686500 |
| N            | 1.35462900  | 0.39127400  | 1.85267000  | N            | 1.64013400  | 1.18504300  | -0.88919300 |
| N            | 1.47547800  | 1.51480400  | -0.28475700 | N            | 0.97766500  | -0.93427700 | -2.04722900 |
| N            | 1.09492900  | -2.07562800 | 1.45316900  | N            | 1.47994200  | 0.72440600  | 1.56798900  |
| N            | 1.29526400  | -0.22940200 | -2.08621900 | N            | 0.43725500  | -2.73029900 | -0.38933100 |
| N            | 1.04016800  | -2.46825700 | -1.01187800 | N            | 0.73553800  | -1.64592900 | 1.84569600  |
| N            | 3.12690400  | -2.92398600 | 0.30157600  | N            | 3.14074200  | -1.04389400 | 2.16060900  |
| N            | 3.25523300  | -1.74574900 | -1.94114700 | N            | 2.48755600  | -3.18627700 | 0.95100800  |
| N            | 3.30034000  | -1.12424900 | 2.11447900  | N            | 3.70114500  | 0.76048300  | 0.44130100  |
| N            | 3.50374300  | 0.76606700  | -1.49783000 | N            | 2.63846900  | -2.73576400 | -1.55694800 |
| N            | 3.55657400  | 1.19170500  | 1.03397700  | N            | 3.39030500  | -0.32172400 | -1.85235500 |
| C            | 0.78652400  | 1.32399700  | 0.94710800  | C            | -0.42275400 | 2.06373400  | 0.42336800  |
| O            | 0.02925200  | 4.20850600  | -0.43284500 | O            | 2.50085100  | 3.65109800  | 0.82166000  |
| C            | 1.14175300  | 4.32086700  | -0.10611600 | C            | 3.32401900  | 3.60372200  | -0.00167000 |
| O            | 2.24886000  | 4.46539500  | 0.21577600  | O            | 4.14061900  | 3.58524900  | -0.82769600 |
| <b>IS-11</b> |             |             |             | <b>IS-12</b> |             |             |             |
| B            | -5.11136800 | -0.84210100 | -2.20408800 | B            | -5.04430200 | 2.06895100  | 0.80107500  |
| N            | -5.84300400 | -1.93495800 | -1.58855300 | N            | -5.70901900 | 2.30798800  | -0.46787900 |
| N            | -3.66727500 | -0.94694300 | -2.29439200 | N            | -3.60042500 | 2.19384400  | 0.85059200  |
| B            | -3.00984200 | -1.96800200 | -1.48929600 | B            | -2.87995000 | 2.18748300  | -0.41653300 |
| B            | -0.81183400 | -1.05676400 | -2.18465000 | B            | -0.76215900 | 2.23731500  | 0.87339900  |
| N            | -1.57276800 | -2.12651800 | -1.55646400 | N            | -1.43687300 | 2.32950200  | -0.41771100 |
| N            | 0.62410300  | -1.15936000 | -2.27440700 | B            | 1.54228700  | 2.19929100  | -0.40084300 |
| B            | 1.29381100  | -2.18685100 | -1.48898300 | B            | 3.69315300  | 2.03753400  | 0.81510500  |
| B            | 3.48747100  | -1.23953900 | -2.18494400 | N            | 2.97913100  | 2.24587400  | -0.44750900 |
| N            | 2.73375100  | -2.31966200 | -1.56409400 | N            | 5.13917800  | 2.06860000  | 0.83081400  |
| N            | 4.93069100  | -1.31156800 | -2.27565100 | B            | 5.83849300  | 2.05086100  | -0.44670900 |
| B            | 5.60983300  | -2.34378600 | -1.50917200 | B            | -5.03309700 | 0.23953200  | 2.34654000  |
| B            | -5.00006700 | 1.52444000  | -1.84098200 | N            | -5.71876000 | 1.44986100  | 1.92789000  |
| N            | -5.72672200 | 0.44290200  | -2.48207200 | N            | -3.58514500 | 0.26667100  | 2.44515300  |
| N            | -3.55218100 | 1.52896300  | -1.92973100 | B            | -2.88700200 | 1.38531300  | 1.82990000  |
| B            | -2.89647500 | 0.28945400  | -2.32326200 | B            | -0.70023400 | 0.27844700  | 2.26078300  |
| B            | -0.69458700 | 1.33591800  | -1.82790000 | N            | -1.44390200 | 1.48627600  | 1.92029800  |
| N            | -1.45178900 | 0.23236700  | -2.40664000 | N            | 0.75939600  | 0.26158000  | 2.28921700  |
| N            | 0.74618200  | 1.30288800  | -1.85400100 | B            | 1.53907900  | 1.39112000  | 1.84562200  |
| B            | 1.38951500  | 0.07542900  | -2.26149400 | B            | 3.64837100  | 0.16585400  | 2.30486500  |
| B            | 3.55239700  | 1.14451700  | -1.84912200 | N            | 2.97465200  | 1.39542700  | 1.91895900  |
| N            | 2.81880500  | 0.03318800  | -2.40491400 | N            | 5.09594000  | 0.13741200  | 2.39617700  |



|   |             |             |             |   |             |             |             |
|---|-------------|-------------|-------------|---|-------------|-------------|-------------|
| N | 4.99898700  | 1.15633900  | -1.92904600 | B | 5.83434300  | 1.24508600  | 1.80931300  |
| B | 5.67506000  | -0.06496300 | -2.34090600 | B | -5.02658700 | -2.01865700 | 1.55814900  |
| B | -4.95615300 | 2.37279400  | 0.38819200  | N | -5.70247700 | -1.04735500 | 2.39887000  |
| N | -5.63311000 | 2.42862100  | -0.89635600 | N | -3.57820500 | -2.09496000 | 1.61949200  |
| N | -3.50632800 | 2.42191600  | 0.40363000  | B | -2.86353500 | -0.97649500 | 2.21878400  |
| B | -2.81245900 | 2.18176800  | -0.85636000 | B | -0.71734500 | -2.03222900 | 1.51971300  |
| B | -0.65098000 | 2.17774000  | 0.35913700  | N | -1.41266200 | -0.99258300 | 2.27135400  |
| N | -1.36668300 | 2.24687900  | -0.90955100 | N | 0.72253400  | -2.13690400 | 1.58828400  |
| N | 0.79168200  | 2.16835300  | 0.35578000  | B | 1.45332300  | -1.01765400 | 2.15905100  |
| B | 3.59448100  | 2.01753900  | 0.36168500  | B | 3.58908100  | -2.10801500 | 1.51964200  |
| N | 2.87803100  | 2.05626200  | -0.92242100 | N | 2.89250700  | -1.07941800 | 2.28312600  |
| N | 5.04225000  | 2.06115400  | 0.36703300  | N | 5.03367300  | -2.21129700 | 1.58716000  |
| B | 5.74232700  | 1.84738700  | -0.88859100 | B | 5.77592000  | -1.13344500 | 2.22039700  |
| B | -5.02392500 | 0.83255900  | 2.22082700  | B | -5.03641500 | -2.46743500 | -0.79002100 |
| N | -5.64747200 | 1.99070900  | 1.60743600  | N | -5.70779300 | -2.70772500 | 0.47530500  |
| N | -3.57624600 | 0.79473800  | 2.30667300  | N | -3.59309100 | -2.59199700 | -0.83177700 |
| B | -2.82142700 | 1.73876600  | 1.49338600  | B | -2.87892400 | -2.58591700 | 0.43809200  |
| B | -0.72503000 | 0.60483800  | 2.19809100  | B | -0.72915400 | -2.54649000 | -0.80732100 |
| N | -1.37375000 | 1.73457700  | 1.54695700  | N | -1.43892100 | -2.72041500 | 0.45643300  |
| N | 0.71424900  | 0.56651800  | 2.28010800  | N | 0.71047300  | -2.68348200 | -0.85239800 |
| B | 1.46325600  | 1.48692800  | 1.44316000  | B | 1.42476100  | -2.66014800 | 0.42082900  |
| B | 3.57243900  | 0.41183400  | 2.16629200  | B | 3.57823400  | -2.58754300 | -0.81033800 |
| N | 2.89494100  | 1.52628900  | 1.52778200  | N | 2.86496400  | -2.78204000 | 0.44671100  |
| N | 5.01905900  | 0.40133600  | 2.23121400  | N | 5.02188400  | -2.70032800 | -0.84735300 |
| B | 5.74565800  | 1.38901600  | 1.45157900  | B | 5.73401500  | -2.72902100 | 0.42107200  |
| B | -5.14604000 | -1.53403600 | 1.85922800  | B | -5.01678500 | -0.63921200 | -2.33650300 |
| N | -5.76108200 | -0.38656100 | 2.50277300  | N | -5.70446700 | -1.85026900 | -1.92184900 |
| N | -3.70552600 | -1.67956000 | 1.94591500  | N | -3.56809700 | -0.66457600 | -2.42742800 |
| B | -2.93360700 | -0.51237100 | 2.34913900  | B | -2.87386000 | -1.78780000 | -1.80958600 |
| B | -0.83697400 | -1.76888700 | 1.86427700  | B | -0.70719400 | -0.68236300 | -2.29480200 |
| N | -1.49310400 | -0.60516900 | 2.45364300  | N | -1.43340400 | -1.88203700 | -1.89935600 |
| N | 0.60320600  | -1.91025000 | 1.94974000  | N | 0.73254800  | -0.72477400 | -2.40865400 |
| B | 1.37035400  | -0.73278600 | 2.34200900  | B | 1.43008900  | -1.86353200 | -1.82196600 |
| B | 3.47875000  | -1.95068300 | 1.83873500  | B | 3.59900900  | -0.74582600 | -2.31938300 |
| N | 2.81335000  | -0.80185900 | 2.43637900  | N | 2.87092700  | -1.94156900 | -1.90878400 |
| N | 4.92441300  | -2.06045800 | 1.90656000  | N | 5.04391500  | -0.78599600 | -2.43025500 |
| B | 5.68717800  | -0.88798700 | 2.30435500  | B | 5.74097400  | -1.91952500 | -1.84127400 |
| B | -5.19024300 | -2.38110200 | -0.36977600 | B | -5.02149500 | 1.61870400  | -1.54615400 |
| N | -5.86716800 | -2.37053100 | 0.91567000  | N | -5.68940300 | 0.64623200  | -2.39134800 |
| N | -3.75194600 | -2.56889600 | -0.38903100 | N | -3.57306600 | 1.69678900  | -1.59870500 |
| B | -3.02885700 | -2.38261500 | 0.86304100  | B | -2.85143400 | 0.58218600  | -2.19304500 |
| B | -0.88118900 | -2.62008000 | -0.36833200 | B | -0.68997000 | 1.58804600  | -1.43166800 |
| N | -1.59183000 | -2.56849400 | 0.90547400  | N | -1.40066300 | 0.60075100  | -2.23438100 |
| N | 0.55701600  | -2.80290200 | -0.38943600 | N | 0.76732400  | 1.58175900  | -1.44946100 |
| B | 1.28366700  | -2.61003000 | 0.86319900  | B | 1.46348300  | 0.50439700  | -2.14516500 |
| B | 3.43388900  | -2.79825700 | -0.37930600 | B | 3.65470000  | 1.52389000  | -1.51482100 |
| N | 2.72459400  | -2.76885700 | 0.89539100  | N | 2.90329200  | 0.53492400  | -2.27601800 |
| N | 4.87681700  | -2.94954600 | -0.40808300 | N | 5.10316400  | 1.55598200  | -1.60003100 |
| B | 5.60216400  | -2.78439300 | 0.84233500  | B | 5.78516500  | 0.45245000  | -2.25206600 |
| H | -6.84379300 | -1.78899100 | -1.51020200 | H | -6.71625700 | 2.18789100  | -0.45551600 |
| H | -6.73404300 | 0.47198500  | -2.36652200 | H | -6.72441000 | 1.35911500  | 1.83016200  |
| H | -6.64380500 | 2.35450400  | -0.84846700 | H | -6.70981100 | -1.01050200 | 2.28504300  |
| H | -6.65776100 | 1.94134900  | 1.53002500  | H | -6.71492800 | -2.58731700 | 0.45766500  |
| H | -6.76683300 | -0.31637000 | 2.39044500  | H | -6.71064600 | -1.75925000 | -1.82980500 |
| H | -6.86534100 | -2.19537000 | 0.86885300  | H | -6.69728200 | 0.60637100  | -2.28344000 |
| H | 6.78216200  | -2.51526200 | -1.62725200 | H | 7.01820400  | 2.20230400  | -0.49684600 |

|              |             |             |             |              |             |             |             |
|--------------|-------------|-------------|-------------|--------------|-------------|-------------|-------------|
| H            | 6.85422500  | -0.07303900 | -2.50632500 | H            | 7.01487500  | 1.32350300  | 1.94132800  |
| H            | 6.91824500  | 2.00561000  | -0.97446600 | H            | 6.95304600  | -1.21936100 | 2.37790700  |
| H            | 6.92958900  | 1.47624200  | 1.54397600  | H            | 6.90459600  | -2.94232200 | 0.45802500  |
| H            | 6.86595900  | -0.95212800 | 2.45978700  | H            | 6.91470000  | -2.05391600 | -1.98890100 |
| H            | 6.76779900  | -3.01700800 | 0.90720300  | H            | 6.96261800  | 0.48445200  | -2.42673200 |
| C            | 1.43941800  | 2.25466600  | -0.96816600 | C            | 0.78981200  | 2.54012600  | 0.99623600  |
| O            | 1.36611900  | 3.54428800  | -1.47129200 | O            | 1.19234900  | 3.77009900  | 1.40993300  |
| C            | 2.67539600  | 4.72456600  | 0.86611900  | C            | 0.61686000  | 4.95920900  | -1.02762800 |
| O            | 2.16134800  | 5.72462000  | 0.98310200  | O            | 0.15842100  | 5.98053200  | -0.86815300 |
| <b>TS-11</b> |             |             |             | <b>TS-12</b> |             |             |             |
| B            | -5.06786300 | -0.46016600 | -2.34020200 | B            | -5.03068200 | 2.25067300  | 0.43957300  |
| N            | -5.79416600 | -1.65401300 | -1.94267300 | N            | -5.69622800 | 2.29810100  | -0.85061500 |
| N            | -3.62198000 | -0.53506200 | -2.43953600 | N            | -3.58431000 | 2.35601900  | 0.46961100  |
| B            | -2.96118000 | -1.67869100 | -1.82308000 | B            | -2.86753700 | 2.13184500  | -0.77966700 |
| B            | -0.76542400 | -0.63613200 | -2.32118200 | B            | -0.74278800 | 2.33678000  | 0.48627100  |
| N            | -1.52162700 | -1.80806900 | -1.90260600 | N            | -1.42167600 | 2.23882500  | -0.80191300 |
| N            | 0.67297500  | -0.70912900 | -2.41477100 | B            | 1.54161000  | 2.05977700  | -0.76725400 |
| B            | 1.34404800  | -1.85757200 | -1.81739300 | B            | 3.69678200  | 2.05597100  | 0.46196200  |
| B            | 3.53574800  | -0.79008500 | -2.31862100 | N            | 2.98321900  | 2.07383900  | -0.81846200 |
| N            | 2.78453600  | -1.96664900 | -1.90148000 | N            | 5.14378300  | 2.06655400  | 0.47141900  |
| N            | 4.98005200  | -0.84070800 | -2.40752100 | B            | 5.84146600  | 1.83441600  | -0.78537000 |
| B            | 5.66008500  | -1.98605700 | -1.82372300 | B            | -5.04992500 | 0.67587600  | 2.24193600  |
| B            | -4.98340000 | 1.78978400  | -1.52524300 | N            | -5.71372700 | 1.82263200  | 1.64828600  |
| N            | -5.69518500 | 0.84882300  | -2.37180900 | N            | -3.60181500 | 0.69140500  | 2.33643000  |
| N            | -3.53551200 | 1.82113700  | -1.59812500 | B            | -2.88419200 | 1.69240800  | 1.56287900  |
| B            | -2.86365800 | 0.69079100  | -2.22251500 | B            | -0.71868800 | 0.62545500  | 2.16358600  |
| B            | -0.67770500 | 1.64129200  | -1.51420600 | N            | -1.43943700 | 1.78079500  | 1.63995200  |
| N            | -1.41660600 | 0.66674500  | -2.30871000 | N            | 0.74014300  | 0.59000600  | 2.19811100  |
| N            | 0.77025000  | 1.63142100  | -1.54397400 | B            | 1.53109000  | 1.63547200  | 1.59347600  |
| B            | 1.43320200  | 0.50651300  | -2.17810100 | B            | 3.62427600  | 0.44848600  | 2.22450900  |
| B            | 3.58058800  | 1.47419500  | -1.51917300 | N            | 2.97034300  | 1.61823900  | 1.65829300  |
| N            | 2.86060700  | 0.50031800  | -2.31352400 | N            | 5.07115300  | 0.40928100  | 2.32218700  |
| N            | 5.02972200  | 1.50991900  | -1.58660900 | B            | 5.82712500  | 1.39841600  | 1.57075200  |
| B            | 5.71662100  | 0.40022000  | -2.22751400 | B            | -5.08576300 | -1.67624800 | 1.80593600  |
| B            | -4.96453800 | 2.19698200  | 0.82956300  | N            | -5.74133400 | -0.57586800 | 2.48960500  |
| N            | -5.63181800 | 2.48699600  | -0.42786500 | N            | -3.63888900 | -1.76755600 | 1.87774800  |
| N            | -3.51576100 | 2.24975500  | 0.86630100  | B            | -2.90311600 | -0.58444900 | 2.30413900  |
| B            | -2.81016200 | 2.25340000  | -0.40919500 | B            | -0.77713500 | -1.76887100 | 1.77157700  |
| B            | -0.65311700 | 2.03753700  | 0.80035700  | N            | -1.45302300 | -0.61764700 | 2.36135000  |
| N            | -1.36771500 | 2.32578300  | -0.43383100 | N            | 0.66079100  | -1.88483400 | 1.85439600  |
| N            | 0.79297100  | 2.03613300  | 0.80554000  | B            | 1.41167800  | -0.70591700 | 2.25560600  |
| B            | 3.59562400  | 1.87165500  | 0.80735900  | B            | 3.52745300  | -1.91619800 | 1.78398900  |
| N            | 2.88772700  | 2.15566800  | -0.43405700 | N            | 2.84968500  | -0.77396100 | 2.38739700  |
| N            | 5.04506900  | 1.93147000  | 0.84165200  | N            | 4.97020800  | -2.03175200 | 1.86685500  |
| B            | 5.76016500  | 1.97815300  | -0.42178500 | B            | 5.72955500  | -0.88510800 | 2.34015000  |
| B            | -5.03104900 | 0.34979200  | 2.34900000  | B            | -5.10845500 | -2.48506200 | -0.44450500 |
| N            | -5.66107800 | 1.59683400  | 1.95350300  | N            | -5.78228800 | -2.51060200 | 0.84226100  |
| N            | -3.58379900 | 0.30843300  | 2.44500600  | N            | -3.66736300 | -2.64093500 | -0.46672000 |
| B            | -2.83040700 | 1.39048300  | 1.82167800  | B            | -2.95061800 | -2.44450500 | 0.78634900  |
| B            | -0.73034400 | 0.16404300  | 2.32814000  | B            | -0.80277300 | -2.63804900 | -0.44960700 |
| N            | -1.38228000 | 1.39012800  | 1.88735400  | N            | -1.51278600 | -2.59666500 | 0.82561600  |
| N            | 0.70792700  | 0.12216400  | 2.42110800  | N            | 0.63442300  | -2.80479400 | -0.47270700 |
| B            | 1.45829800  | 1.18385300  | 1.76928200  | B            | 1.35130800  | -2.59097000 | 0.78110800  |
| B            | 3.56802900  | 0.00714700  | 2.31895600  | B            | 3.50374200  | -2.75181000 | -0.44549400 |
| N            | 2.88875300  | 1.22020300  | 1.88769600  | N            | 2.78944900  | -2.73018700 | 0.82579600  |
| N            | 5.01387700  | -0.01201900 | 2.39977800  | N            | 4.94555900  | -2.89254700 | -0.46318300 |

|             |             |             |             |             |             |             |             |
|-------------|-------------|-------------|-------------|-------------|-------------|-------------|-------------|
| B           | 5.74348500  | 1.09811900  | 1.80717000  | B           | 5.66079800  | -2.72893200 | 0.79299300  |
| B           | -5.12917800 | -1.90094700 | 1.53400500  | B           | -5.06226700 | -0.91134400 | -2.24792200 |
| N           | -5.76049800 | -0.90608500 | 2.38264100  | N           | -5.76915700 | -2.03421300 | -1.65731500 |
| N           | -3.68804400 | -2.04839300 | 1.60453100  | N           | -3.61487300 | -0.97633700 | -2.33429100 |
| B           | -2.93088300 | -0.97730400 | 2.23652500  | B           | -2.93748100 | -2.00554900 | -1.55692800 |
| B           | -0.81971600 | -2.09955500 | 1.53976400  | B           | -0.75386900 | -1.02469700 | -2.20570600 |
| N           | -1.49108200 | -1.07798600 | 2.33644600  | N           | -1.49874900 | -2.13694500 | -1.63166000 |
| N           | 0.62044500  | -2.24346900 | 1.61074700  | N           | 0.68494800  | -1.10878400 | -2.31240000 |
| B           | 1.37275400  | -1.16063200 | 2.23449700  | B           | 1.36488500  | -2.15600400 | -1.55907300 |
| B           | 3.49497000  | -2.24504100 | 1.52786700  | B           | 3.55098200  | -1.16671300 | -2.22068000 |
| N           | 2.81467900  | -1.23990800 | 2.33167900  | N           | 2.80416600  | -2.27210800 | -1.63230800 |
| N           | 4.94025500  | -2.35969700 | 1.58797600  | N           | 4.99451200  | -1.24832100 | -2.32437500 |
| B           | 5.68964400  | -1.28697900 | 2.22127400  | B           | 5.67416600  | -2.28919400 | -1.56965800 |
| B           | -5.14675600 | -2.30735700 | -0.81910600 | B           | -5.02337000 | 1.44041500  | -1.81020100 |
| N           | -5.83342300 | -2.54489600 | 0.43865700  | N           | -5.71046100 | 0.36297300  | -2.49897300 |
| N           | -3.70639700 | -2.47474300 | -0.85823700 | N           | -3.57404800 | 1.48241200  | -1.87307100 |
| B           | -2.99584500 | -2.52593600 | 0.41365300  | B           | -2.87503700 | 0.27810400  | -2.29655300 |
| B           | -0.83653600 | -2.50435200 | -0.81788800 | B           | -0.69439500 | 1.34774300  | -1.70057400 |
| N           | -1.55771400 | -2.70347300 | 0.43439100  | N           | -1.42488800 | 0.26354000  | -2.34521100 |
| N           | 0.60282500  | -2.66672900 | -0.85721500 | N           | 0.76268200  | 1.31737700  | -1.72727800 |
| B           | 1.31641400  | -2.71560400 | 0.41648300  | B           | 1.43866400  | 0.13325100  | -2.24856900 |
| B           | 3.47794800  | -2.64752600 | -0.81672100 | B           | 3.64758300  | 1.19452400  | -1.76765000 |
| N           | 2.75760700  | -2.86679000 | 0.43241200  | N           | 2.87857900  | 0.11719200  | -2.37725500 |
| N           | 4.92178900  | -2.78148000 | -0.85674500 | N           | 5.09612300  | 1.18923800  | -1.85361500 |
| B           | 5.63338500  | -2.85864200 | 0.40998400  | B           | 5.75739700  | -0.01022100 | -2.33780200 |
| H           | -6.79674700 | -1.53202700 | -1.84748700 | H           | -6.70446500 | 2.19117000  | -0.81718000 |
| H           | -6.70266500 | 0.84325100  | -2.25410900 | H           | -6.72109500 | 1.73663600  | 1.56456600  |
| H           | -6.64260100 | 2.40380700  | -0.40484300 | H           | -6.74903600 | -0.53922200 | 2.37892400  |
| H           | -6.67018400 | 1.55415800  | 1.85882400  | H           | -6.78600200 | -2.36865700 | 0.80326800  |
| H           | -6.76490100 | -0.82035100 | 2.26872600  | H           | -6.77326300 | -1.91258900 | -1.57919300 |
| H           | -6.83416200 | -2.37986500 | 0.41705500  | H           | -6.71948300 | 0.35965400  | -2.39475800 |
| H           | 6.83552800  | -2.12443500 | -1.95430000 | H           | 7.02466600  | 1.94672800  | -0.85333200 |
| H           | 6.89623800  | 0.43239400  | -2.38699100 | H           | 7.00856200  | 1.48001900  | 1.69145700  |
| H           | 6.93537700  | 2.16047800  | -0.46039600 | H           | 6.90422700  | -0.96626200 | 2.51717100  |
| H           | 6.92490900  | 1.17988700  | 1.93132600  | H           | 6.82989000  | -2.94376800 | 0.86059600  |
| H           | 6.86749700  | -1.37525900 | 2.37226100  | H           | 6.84427300  | -2.46836000 | -1.69690900 |
| H           | 6.79958700  | -3.09484000 | 0.44125300  | H           | 6.93387300  | -0.02464200 | -2.52050300 |
| C           | 1.44813600  | 2.38376500  | -0.46706700 | C           | 0.81500700  | 2.61580800  | 0.54773500  |
| O           | 1.18629100  | 3.70335300  | -0.83043700 | C           | 1.21766000  | 3.92946600  | 0.81615700  |
| C           | 1.92628700  | 4.88174200  | 0.54120300  | O           | 1.25413200  | 4.99785000  | -0.66393500 |
| O           | 1.77592000  | 6.00219900  | 0.43636500  | O           | 1.46829700  | 6.10902200  | -0.51147100 |
| <b>P-11</b> |             |             |             | <b>P-12</b> |             |             |             |
| B           | -5.01170100 | 0.72082300  | -2.23426600 | B           | 5.02543000  | 1.80539600  | 0.47506200  |
| N           | -5.73395500 | -0.51243700 | -2.49336000 | N           | 5.66648400  | 1.31802300  | 1.68452500  |
| N           | -3.56395600 | 0.70076100  | -2.32510100 | N           | 3.59068900  | 2.02749200  | 0.50035300  |
| B           | -2.90571700 | -0.59880200 | -2.33993200 | B           | 2.83412200  | 1.41676700  | 1.59339200  |
| B           | -0.71148800 | 0.54903000  | -2.22018900 | B           | 0.76262100  | 2.22023000  | 0.50197300  |
| N           | -1.46401400 | -0.67600900 | -2.44502300 | N           | 1.40510100  | 1.61576400  | 1.66485200  |
| N           | 0.72929800  | 0.52554400  | -2.31541500 | B           | -1.55701200 | 1.73813200  | 1.64252900  |
| B           | 1.40270100  | -0.76731700 | -2.34077800 | B           | -3.67587100 | 2.32757700  | 0.46015500  |
| B           | 3.59077800  | 0.41016900  | -2.18779500 | N           | -3.00118800 | 1.84034600  | 1.66600900  |
| N           | 2.84646900  | -0.81907100 | -2.43189600 | N           | -5.12049500 | 2.46548000  | 0.46704800  |
| N           | 5.03645300  | 0.41756300  | -2.24926000 | B           | -5.86635700 | 1.87562600  | 1.56903000  |
| B           | 5.72089100  | -0.86398600 | -2.29417600 | B           | 4.96611700  | 1.02346400  | -1.78647500 |
| B           | -4.95997900 | 2.28808900  | -0.42465900 | N           | 5.70063700  | 1.80830300  | -0.80992400 |
| N           | -5.64871600 | 1.88007500  | -1.63734700 | N           | 3.52788300  | 1.19123000  | -1.86085100 |

|   |             |             |             |   |             |             |             |
|---|-------------|-------------|-------------|---|-------------|-------------|-------------|
| N | -3.51127800 | 2.35152400  | -0.44271500 | B | 2.86983300  | 1.87321800  | -0.76233900 |
| B | -2.81924800 | 1.66703100  | -1.52729200 | B | 0.64197000  | 1.33472700  | -1.74321700 |
| B | -0.65635000 | 2.14256200  | -0.39836200 | N | 1.44239200  | 2.11292200  | -0.79303600 |
| N | -1.37158600 | 1.68362400  | -1.58715300 | N | -0.81069200 | 1.46831100  | -1.82769300 |
| N | 0.78796300  | 2.14598200  | -0.40045900 | B | -1.52360300 | 2.21892100  | -0.79854000 |
| B | 1.46929400  | 1.46977200  | -1.50196600 | B | -3.70379200 | 1.54789000  | -1.80102500 |
| B | 3.59227500  | 2.01693000  | -0.39144700 | N | -2.96632200 | 2.33143600  | -0.82184900 |
| N | 2.89692500  | 1.52872300  | -1.56963500 | N | -5.14667100 | 1.67206400  | -1.88750700 |
| N | 5.03940900  | 2.09488500  | -0.40058300 | B | -5.83403400 | 2.33915600  | -0.79417000 |
| B | 5.75036900  | 1.42640000  | -1.48070300 | B | 4.79671800  | -1.31711900 | -2.24952600 |
| B | -4.99199700 | 1.48406600  | 1.82368100  | N | 5.56062300  | -0.10385000 | -2.48171000 |
| N | -5.63693300 | 2.35812700  | 0.85915000  | N | 3.35018400  | -1.25224500 | -2.34751400 |
| N | -3.54468400 | 1.50684600  | 1.91100700  | B | 2.72523700  | 0.06378800  | -2.31002400 |
| B | -2.81278500 | 2.14014900  | 0.82020600  | B | 0.49442200  | -1.03134800 | -2.23172300 |
| B | -0.68597500 | 1.34726900  | 1.81691500  | N | 1.28146700  | 0.18753700  | -2.38221600 |
| N | -1.36958500 | 2.21516900  | 0.86848300  | N | -0.94566600 | -0.98114600 | -2.34045800 |
| N | 0.75641700  | 1.33618500  | 1.85417800  | B | -1.58514700 | 0.32805200  | -2.31332400 |
| B | 3.56206700  | 1.20125600  | 1.82283400  | B | -3.80532900 | -0.79693200 | -2.26156500 |
| N | 2.85437300  | 2.05752600  | 0.87440400  | N | -3.02586900 | 0.42417200  | -2.43593700 |
| N | 5.00871200  | 1.24421700  | 1.91521000  | N | -5.25144700 | -0.76015100 | -2.36903300 |
| B | 5.74581900  | 1.91054100  | 0.85505200  | B | -5.90598700 | 0.53825100  | -2.38691300 |
| B | -5.07596400 | -0.87333300 | 2.23240200  | B | 4.69362500  | -2.89455100 | -0.45345100 |
| N | -5.70586400 | 0.40872900  | 2.49046300  | N | 5.39578300  | -2.50372300 | -1.66385100 |
| N | -3.63096500 | -0.96087500 | 2.32615000  | N | 3.24448900  | -2.91217600 | -0.47681800 |
| B | -2.87374500 | 0.28531200  | 2.33622900  | B | 2.57844800  | -2.21056800 | -1.56707600 |
| B | -0.77585700 | -1.03800800 | 2.22182700  | B | 0.39523900  | -2.63800900 | -0.46281700 |
| N | -1.42864300 | 0.24770900  | 2.42939800  | N | 1.13457700  | -2.20142700 | -1.64282900 |
| N | 0.66227600  | -1.12902600 | 2.31754800  | N | -1.04912300 | -2.66493500 | -0.48878400 |
| B | 1.41391300  | 0.11106200  | 2.29933200  | B | -1.71529600 | -1.95686400 | -1.57706100 |
| B | 3.52750300  | -1.16992000 | 2.21913900  | B | -3.89991200 | -2.37650200 | -0.47321800 |
| N | 2.84070400  | 0.09636100  | 2.42633800  | N | -3.15809200 | -1.95188300 | -1.65444400 |
| N | 4.97118600  | -1.21866400 | 2.30766700  | N | -5.34855500 | -2.39376500 | -0.49757300 |
| B | 5.69876600  | 0.04115500  | 2.35384300  | B | -6.01907700 | -1.73109300 | -1.60551900 |
| B | -5.13678000 | -2.44140000 | 0.42103600  | B | 4.74023600  | -2.11476100 | 1.80883800  |
| N | -5.79497900 | -1.98306600 | 1.63207900  | N | 5.36139800  | -2.99341100 | 0.83290000  |
| N | -3.69609300 | -2.61038300 | 0.44290800  | N | 3.29150000  | -2.08246000 | 1.88415600  |
| B | -2.96188100 | -1.98366200 | 1.53423900  | B | 2.54600800  | -2.66934200 | 0.77876600  |
| B | -0.82457700 | -2.62380300 | 0.42190900  | B | 0.43831900  | -1.82500300 | 1.78795800  |
| N | -1.52249400 | -2.12232300 | 1.60271600  | N | 1.10052800  | -2.68421400 | 0.81357000  |
| N | 0.61579600  | -2.78735400 | 0.44477800  | N | -1.00518800 | -1.81073700 | 1.86501000  |
| B | 1.34576100  | -2.15434700 | 1.53873700  | B | -1.74842200 | -2.41746500 | 0.76737800  |
| B | 3.49317200  | -2.75044100 | 0.43284500  | B | -3.86358000 | -1.59614700 | 1.78367500  |
| N | 2.78720500  | -2.26766900 | 1.61284500  | N | -3.19310800 | -2.43559200 | 0.80030500  |
| N | 4.93776000  | -2.88245100 | 0.46205400  | N | -5.31272800 | -1.59293400 | 1.85517700  |
| B | 5.66374600  | -2.25029200 | 1.55346700  | B | -6.05379700 | -2.19488400 | 0.75859800  |
| B | -5.10438200 | -1.63793800 | -1.82537900 | B | 4.90848900  | 0.22550600  | 2.27057900  |
| N | -5.81436000 | -2.46318800 | -0.86390600 | N | 5.49084600  | -1.08339500 | 2.50381600  |
| N | -3.66199800 | -1.76652800 | -1.90918200 | N | 3.46836800  | 0.36261100  | 2.36818400  |
| B | -2.97574300 | -2.43712100 | -0.81235000 | B | 2.65993600  | -0.84860400 | 2.33578300  |
| B | -0.79219200 | -1.81703400 | -1.82916200 | B | 0.58515200  | 0.54654900  | 2.23468800  |
| N | -1.53623700 | -2.60380500 | -0.85177900 | N | 1.21406600  | -0.75965300 | 2.41456800  |
| N | 0.64984300  | -1.94138200 | -1.91204500 | N | -0.86986100 | 0.64757800  | 2.32706500  |
| B | 1.33996500  | -2.60778400 | -0.81111100 | B | -1.65154700 | -0.58649500 | 2.32153000  |
| B | 3.52642800  | -1.94421200 | -1.80451600 | B | -3.76053900 | 0.74677400  | 2.25266100  |
| N | 2.78234300  | -2.74821800 | -0.84118300 | N | -3.09561800 | -0.53723800 | 2.43133900  |
| N | 4.97302700  | -2.03757300 | -1.86994000 | N | -5.20556800 | 0.83775200  | 2.34233000  |

|   |             |             |             |   |             |             |             |
|---|-------------|-------------|-------------|---|-------------|-------------|-------------|
| B | 5.66053600  | -2.72930700 | -0.79113900 | B | -5.97374400 | -0.39551400 | 2.34987400  |
| H | -6.74024600 | -0.45182700 | -2.38014300 | H | 6.66278600  | 1.14655900  | 1.59978600  |
| H | -6.65818400 | 1.81958300  | -1.55717900 | H | 6.69605000  | 1.61664500  | -0.77084100 |
| H | -6.64663700 | 2.27076500  | 0.81376200  | H | 6.56407400  | -0.19998100 | -2.36770200 |
| H | -6.71349600 | 0.42351300  | 2.37460700  | H | 6.40657700  | -2.47506300 | -1.58237200 |
| H | -6.79718300 | -1.84902400 | 1.55053400  | H | 6.37360200  | -2.93801200 | 0.79456700  |
| H | -6.81473400 | -2.30029500 | -0.82010200 | H | 6.49761700  | -1.13362900 | 2.39002200  |
| H | 6.90034300  | -0.91723200 | -2.44870900 | H | -7.03677900 | 2.06576800  | 1.67952600  |
| H | 6.93230800  | 1.53150100  | -1.57902200 | H | -7.00231600 | 2.56178700  | -0.85605000 |
| H | 6.92111800  | 2.07846000  | 0.93356700  | H | -7.07743500 | 0.62580000  | -2.58167400 |
| H | 6.87692200  | 0.05024700  | 2.52654200  | H | -7.20086900 | -1.80450900 | -1.73085900 |
| H | 6.83873000  | -2.40334300 | 1.67073500  | H | -7.23849500 | -2.30113500 | 0.81326100  |
| H | 6.82961800  | -2.94542600 | -0.85154900 | H | -7.15053300 | -0.38001500 | 2.53081100  |
| C | 1.44995900  | 2.11623100  | 0.87476000  | C | -0.75838100 | 2.45565500  | 0.52627000  |
| C | 1.47339900  | 4.92149100  | -0.20203500 | C | 2.65753200  | 4.78601200  | -0.05036800 |
| O | 0.42790700  | 5.18825100  | 0.22915400  | O | 3.39695800  | 4.82210100  | -0.94644800 |
| O | 2.52389900  | 4.68244100  | -0.64558800 | O | 1.91188000  | 4.76278100  | 0.84387600  |
